# Supplementary material
Source: publisher figshare collection journal article supplement (https://gsajournals.figshare.com/ndownloader/files/24562649)
Supplement: Supplementary file 1 [file 24562649]

## Sheet: Sheet1
Table S3. Number of Pfam domain-containing genes in the Hydra viridissima A99 genome
Hvir: Hydra viridissima A99, Hvul v1: Hydra vulgaris (Chapman et al., 2010), Hvul v2: Hydra vulgaris (Hydra2.0), Ch: Clytia hemisphaerica, Mv: Morbakka virulenta, Aa: Aurelia aurita, Nv, Nematostella vectensis, Ad: Acropora digitifera
Domain	Hvir	Hvul v1	Hvul v2	Ch	Aa	Mv	Nv	Ad
14-3-3	6	4	4	3	5	6	4	8
1-cysPrx_C	5	5	4	3	4	1	4	2
2_5_RNA_ligase2	1	2	2	1	3	4	3	2
2-Hacid_dh	2	1	1	2	2	2	7	3
2-Hacid_dh_C	10	8	6	10	13	15	16	9
2-oxoacid_dh	6	3	3	3	8	5	5	2
2-oxogl_dehyd_N	2	1	1	1	1	1	2	0
2OG-FeII_Oxy	9	8	8	12	7	13	13	7
2OG-FeII_Oxy_2	5	8	8	5	8	7	8	5
2OG-FeII_Oxy_3	14	16	16	29	24	28	34	21
2OG-FeII_Oxy_4	2	2	2	5	6	9	6	1
3-HAO	1	1	2	1	1	1	1	1
3-PAP	1	2	1	1	2	2	2	2
3Beta_HSD	11	9	9	9	12	10	22	13
3HCDH	4	4	4	3	4	4	6	3
3HCDH_N	3	6	6	7	8	6	13	4
40S_S4_C	1	2	1	1	1	1	2	1
40S_SA_C	1	1	1	1	1	1	1	0
4HBT	5	7	8	4	6	7	7	5
4HBT_3	1	1	1	1	0	0	1	1
5_3_exonuc	3	4	4	2	2	0	2	2
5_nucleotid	3	6	5	2	3	3	3	5
5_nucleotid_C	2	2	3	2	3	7	2	0
5-FTHF_cyc-lig	1	1	1	1	2	3	1	2
53-BP1_Tudor	1	0	0	1	3	3	6	3
60KD_IMP	4	3	4	2	2	2	2	2
6PF2K	4	2	5	4	3	3	4	3
6PGD	1	1	1	1	2	1	2	1
7tm_1	245	292	268	463	129	440	1089	176
7tm_2	56	55	73	66	33	40	61	51
7tm_3	41	58	65	95	16	37	41	30
7tm_4	9	8	10	27	19	85	302	39
7tm_7	0	0	0	5	2	2	3	0
7TM_GPCR_Srbc	5	1	2	9	2	16	14	2
7TM_GPCR_Srd	2	0	0	2	1	1	14	1
7TM_GPCR_Srh	0	1	1	1	0	1	2	2
7TM_GPCR_Srj	0	0	0	1	0	0	0	0
7TM_GPCR_Srsx	75	81	70	98	45	154	480	92
7TM_GPCR_Srt	0	0	1	6	1	2	2	1
7TM_GPCR_Srv	3	8	7	24	9	32	91	35
7TM_GPCR_Srw	12	15	14	21	5	32	98	20
7TM_GPCR_Srx	45	53	46	80	34	113	293	51
A_deamin	2	2	2	4	3	3	4	5
A_deaminase	9	2	3	4	3	3	3	5
A2M	2	3	3	2	4	5	3	3
A2M_comp	2	3	3	2	4	4	5	6
A2M_N	2	3	2	2	4	5	1	2
A2M_N_2	2	3	2	2	5	6	3	3
A2M_recep	1	4	3	2	4	4	1	5
AA_kinase	4	1	1	1	5	1	4	2
AA_permease	21	26	22	18	17	22	24	24
AA_permease_2	19	23	18	16	16	23	22	17
AA_permease_C	5	5	5	3	4	5	2	8
AA_permease_N	1	0	0	2	1	2	2	3
Aa_trans	32	41	43	29	44	31	33	15
AAA	90	91	83	87	81	79	95	195
AAA_11	17	15	15	16	12	30	19	54
AAA_12	13	12	11	14	9	18	15	48
AAA_13	1	7	2	4	3	3	4	2
AAA_14	48	33	36	32	24	24	24	16
AAA_15	12	11	12	12	13	9	12	6
AAA_16	188	101	88	110	88	84	128	450
AAA_17	19	16	12	12	13	12	14	9
AAA_18	49	41	38	35	36	35	48	33
AAA_19	40	19	45	57	22	54	33	74
AAA_2	28	9	15	17	23	15	25	16
AAA_21	46	29	33	26	37	25	59	34
AAA_22	182	87	95	127	83	103	123	263
AAA_23	21	14	18	12	17	10	30	21
AAA_24	29	15	12	14	15	12	17	15
AAA_25	23	7	14	14	15	10	15	24
AAA_28	15	9	11	9	12	5	19	10
AAA_29	32	26	33	30	23	17	50	29
AAA_3	9	9	6	10	8	4	5	4
AAA_30	67	28	51	71	28	71	41	75
AAA_31	9	8	7	4	4	3	4	2
AAA_33	43	41	39	33	36	37	44	26
AAA_34	3	4	3	4	3	3	4	10
AAA_35	0	0	0	7	0	0	0	0
AAA_5	66	65	65	67	64	54	77	63
AAA_6	11	13	12	17	16	12	25	23
AAA_7	11	12	14	18	17	13	21	17
AAA_8	11	12	12	19	15	13	20	21
AAA_9	11	12	12	21	17	17	19	22
AAA_assoc_2	2	3	3	3	4	4	4	1
AAA_PrkA	3	0	1	1	2	0	1	2
AAR2	1	1	1	1	1	1	1	1
AARP2CN	2	2	2	2	2	2	3	1
AATF-Che1	1	2	2	1	1	1	1	2
ABA_GPCR	1	1	1	1	1	1	1	1
ABC_ATPase	2	1	1	2	2	3	4	3
ABC_membrane	14	16	17	24	23	17	51	43
ABC_membrane_2	4	3	3	3	3	4	6	4
ABC_tran	79	80	76	56	65	44	115	91
ABC_tran_Xtn	7	3	3	2	5	3	3	2
ABC_trans_CmpB	1	0	0	2	1	1	2	2
ABC1	4	2	3	2	3	3	4	1
ABC2_membrane	10	12	14	5	10	6	7	7
ABC2_membrane_3	7	17	13	10	9	10	7	9
AbfB	14	18	29	4	7	11	3	4
Abhydro_lipase	2	4	5	5	3	4	6	6
Abhydrolase_1	35	27	28	39	30	34	45	42
Abhydrolase_2	5	2	5	4	3	2	5	3
Abhydrolase_3	2	5	4	6	11	6	30	12
Abhydrolase_4	1	0	0	1	1	0	0	0
Abhydrolase_5	4	1	2	5	3	2	2	1
Abhydrolase_6	21	13	16	24	21	14	29	32
Abi_HHR	1	1	1	1	1	1	2	1
ABM	0	0	0	1	0	1	1	0
AC_N	4	4	4	3	2	3	3	2
Ac76	0	0	0	1	0	0	0	0
ACAS_N	5	3	4	4	3	5	4	4
Acatn	2	2	3	2	1	3	2	1
ACBP	6	5	4	3	6	4	7	6
ACC_central	1	2	3	1	1	4	2	2
Acetate_kinase	0	0	0	1	1	1	0	0
Acetyltransf_1	21	21	22	17	19	18	36	12
Acetyltransf_10	14	15	16	14	12	12	29	7
Acetyltransf_11	0	0	0	1	2	0	0	0
Acetyltransf_13	1	1	1	1	1	2	1	1
Acetyltransf_16	1	0	1	1	1	1	1	1
Acetyltransf_2	1	1	1	1	0	1	0	5
Acetyltransf_3	5	2	3	3	6	3	12	1
Acetyltransf_4	2	1	1	2	4	4	10	2
Acetyltransf_5	0	0	0	1	1	1	0	1
Acetyltransf_7	13	13	14	13	10	12	30	9
Acetyltransf_8	1	2	2	1	4	1	2	0
Acetyltransf_9	5	5	5	1	3	2	7	0
Acetyltransf_CG	2	3	3	1	1	2	7	1
Acid_PPase	1	0	0	1	1	1	2	0
Aconitase	3	3	2	2	4	2	3	4
Aconitase_C	3	3	2	2	3	2	3	4
ACOX	5	3	3	3	2	4	4	2
ACP_syn_III	2	1	2	1	3	2	1	0
ACP_syn_III_C	0	0	0	1	1	0	0	0
ACR_tran	4	2	2	6	2	2	11	6
ACT	8	1	3	2	2	1	5	1
ACT_7	2	1	1	2	1	2	2	1
Actin	17	16	16	18	20	19	25	23
Activin_recp	2	3	3	3	3	2	3	2
Acyl_transf_3	7	3	4	13	2	3	3	4
Acyl-CoA_dh_1	12	12	12	12	12	13	17	12
Acyl-CoA_dh_2	11	9	9	10	11	10	14	9
Acyl-CoA_dh_M	17	12	13	12	11	14	17	10
Acyl-CoA_dh_N	10	9	9	7	11	12	11	4
Acylphosphatase	1	1	1	1	0	0	1	1
Acyltransf_C	5	3	4	3	4	3	5	2
Acyltransferase	9	9	11	9	9	8	16	8
AD	1	1	1	1	1	1	1	2
ADAM_CR	4	6	8	9	4	5	3	3
ADAM_spacer1	2	1	2	5	9	8	14	11
ADAM17_MPD	3	3	3	3	2	2	1	0
Adap_comp_sub	7	8	8	7	9	11	10	10
Adaptin_binding	1	1	1	2	1	1	0	0
Adaptin_N	20	28	25	19	25	20	34	31
Adeno_E3_CR1	0	6	3	1	4	2	8	30
Adeno_E3_CR2	0	2	1	8	0	5	2	1
AdenylateSensor	1	0	1	1	2	1	1	0
Adenylsucc_synt	2	1	1	1	2	1	2	1
ADH_N	12	11	11	16	16	16	12	9
ADH_N_2	3	2	1	3	2	1	1	2
adh_short	50	54	54	59	50	59	87	62
adh_short_C2	46	53	50	52	47	55	83	54
ADH_zinc_N	17	14	13	18	19	16	16	16
ADH_zinc_N_2	11	6	7	13	8	7	11	10
ADIP	6	3	3	7	5	6	10	9
Adipokin_hormo	0	0	0	1	0	0	0	0
ADK	11	12	10	9	10	11	11	8
ADK_lid	3	3	3	5	4	17	8	5
AdoHcyase	3	3	2	2	2	2	3	3
AdoHcyase_NAD	4	3	2	2	3	2	3	3
AdoMet_MTase	1	3	1	2	1	1	1	2
ADP_PFK_GK	2	2	3	2	1	3	1	1
ADP_ribosyl_GH	4	3	3	6	12	6	7	4
Aerolysin	3	2	2	7	0	0	9	4
AF-4	1	1	1	3	1	2	1	1
AFG1_ATPase	4	3	2	2	2	2	3	2
AftA_N	0	0	0	1	0	0	0	0
Agenet	6	4	3	10	6	5	6	6
AGTRAP	1	1	1	1	1	1	0	1
Aha1_N	1	1	1	1	0	1	1	0
AhpC-TSA	17	18	18	21	16	18	28	12
AhpC-TSA_2	2	2	2	1	1	3	2	2
AHSA1	1	1	1	1	1	1	1	1
AI-2E_transport	2	1	1	1	1	0	2	1
AIF_C	1	1	1	1	1	1	1	1
AIG1	21	16	15	22	11	6	5	18
AIG2_2	2	2	1	1	1	0	3	3
AIP3	1	3	1	2	1	1	1	1
AIPR	0	0	0	1	0	0	0	0
AIRS	4	2	3	1	2	3	1	0
AIRS_C	5	4	3	1	3	3	2	3
AJAP1_PANP_C	0	0	0	3	0	0	0	0
AKAP28	1	1	2	1	1	1	1	1
AKAP7_NLS	3	3	3	3	3	3	3	5
Ala_racemase_N	5	1	1	2	1	1	6	1
ALAD	2	2	2	1	2	0	1	1
AlaDh_PNT_C	11	7	6	5	9	7	14	3
AlaDh_PNT_N	1	3	3	2	5	3	5	2
AlbA_2	9	7	6	4	4	3	3	10
Aldedh	17	22	20	15	23	18	28	19
Aldo_ket_red	10	10	11	9	14	18	12	11
Aldolase_II	4	5	4	5	2	3	5	3
Aldose_epim	2	2	1	2	1	1	2	2
Alg14	1	1	1	1	1	1	1	1
Alg6_Alg8	2	1	2	2	3	3	3	4
ALIX_LYPXL_bnd	3	3	3	2	1	2	1	3
Alk_phosphatase	1	6	5	1	2	2	3	8
Alkyl_sulf_C	5	6	5	3	2	4	2	0
Alkyl_sulf_dimr	2	1	1	2	1	0	2	1
ALMS_motif	1	0	1	1	2	1	1	1
ALO	0	0	0	2	1	1	3	4
Alpha_adaptin_C	1	1	1	1	1	1	1	2
Alpha_adaptinC2	5	4	4	4	3	4	4	5
Alpha_kinase	1	2	2	22	2	21	7	9
Alpha_L_fucos	3	12	10	1	4	3	12	8
Alpha-2-MRAP_C	2	1	0	2	2	1	1	0
Alpha-amylase	4	2	1	2	5	2	4	4
Alpha-amylase_C	1	1	1	1	2	1	2	3
Alpha-mann_mid	4	4	4	4	3	4	3	1
ALS2CR11	0	0	0	1	0	0	1	0
ALS2CR8	23	86	59	25	10	23	8	3
Amastin	1	0	2	7	0	0	0	0
Amidase	4	6	4	3	6	1	10	7
Amidinotransf	3	2	3	5	2	2	2	4
Amidohydro_1	6	3	3	4	5	5	18	6
Amidohydro_2	1	1	2	2	1	4	2	4
Amidohydro_3	5	2	2	3	4	4	16	5
Amino_oxidase	11	11	11	20	14	21	22	26
Aminotran_1_2	21	24	20	16	22	19	30	20
Aminotran_3	12	8	10	6	9	7	7	6
Aminotran_4	1	4	5	2	4	2	2	2
Aminotran_5	22	15	14	19	18	17	24	15
Aminotran_MocR	0	0	0	1	2	0	2	0
AMMECR1	2	0	1	1	1	1	1	1
Ammonium_transp	7	8	6	9	8	8	18	7
Amnionless	4	1	2	5	1	2	2	3
AMP_N	2	2	2	4	3	1	5	2
AMP-binding	22	27	22	21	24	18	48	35
AMP-binding_C	12	7	8	11	15	8	36	12
AMPK1_CBM	2	1	2	2	1	2	1	1
AMPKBI	0	1	1	1	0	1	1	0
An_peroxidase	4	3	2	17	6	7	7	18
ANAPC1	3	0	1	1	1	0	1	2
ANAPC10	3	3	3	3	4	3	4	3
ANAPC2	0	1	1	1	0	1	1	0
ANAPC3	182	166	157	61	37	36	46	44
ANAPC4	1	1	1	1	1	1	1	1
ANAPC4_WD40	140	135	140	141	154	160	186	159
ANAPC5	2	2	2	3	0	3	12	9
ANAPC8	1	1	1	1	1	2	1	0
Anemone_cytotox	9	6	6	3	0	1	0	4
ANF_receptor	54	66	68	48	33	62	64	65
Anillin	2	2	2	2	2	2	1	1
Ank	165	226	205	223	172	185	172	283
Ank_2	179	509	233	245	188	196	187	309
Ank_3	162	413	210	220	175	185	172	278
Ank_4	170	500	226	234	179	193	176	294
Ank_5	166	477	221	223	177	186	179	288
ANKH	0	0	0	1	1	1	0	0
Annexin	5	7	6	4	4	4	6	7
Anoct_dimer	3	10	8	5	9	6	10	8
Anoctamin	6	13	11	12	11	11	17	13
Anp1	1	2	2	2	1	3	2	0
ANTH	5	5	6	5	5	4	5	2
Anth_Ig	0	2	0	1	1	1	0	2
Anticodon_1	7	2	3	3	7	3	7	5
Antistasin	7	18	13	2	4	2	0	1
AOX	1	0	0	1	1	1	1	1
AP_endonuc_2	1	2	2	2	4	3	4	3
AP-5_subunit_s1	1	0	1	1	1	1	0	1
AP1AR	1	0	0	1	1	1	1	1
AP3B1_C	1	1	1	1	1	1	1	0
AP3D1	1	1	1	1	1	1	1	1
AP4E_app_platf	2	1	2	2	0	1	2	0
ApbA	2	0	1	3	2	3	4	1
APC_N_CC	1	0	0	1	0	0	0	0
APCDDC	1	1	1	1	1	1	1	1
ApeC	5	5	5	5	7	4	10	24
APG12	5	3	2	4	5	5	5	4
APG17	1	3	3	1	2	1	0	0
APG6	5	7	6	8	6	7	9	11
APG9	0	1	1	2	1	1	1	1
APH	36	22	22	38	29	37	54	32
Aph-1	1	1	1	1	0	2	2	3
API5	1	1	1	3	1	3	2	3
APOBEC_N	0	0	0	4	0	5	3	1
ApoL	0	1	0	2	1	3	1	9
Apolipoprotein	6	17	11	8	4	1	7	9
ApoLp-III	2	1	0	1	1	1	3	2
ApoO	1	1	1	1	1	3	1	1
APP_amyloid	1	1	1	1	1	1	1	1
APP_Cu_bd	1	1	1	1	1	1	2	1
APP_E2	1	1	1	2	1	1	1	2
APP_N	1	1	1	2	1	1	1	1
APS_kinase	4	3	1	1	2	1	2	2
Apt1	1	1	2	2	2	2	2	3
Apyrase	2	1	1	1	2	1	1	1
Aquarius_N	2	4	2	1	1	3	2	4
AraC_binding	1	1	0	1	3	1	1	1
Archease	1	0	0	1	1	1	0	2
ARD	1	1	1	1	1	0	0	0
Arf	127	112	122	128	119	106	157	90
ARF7EP_C	1	1	1	1	0	1	1	1
Arfaptin	3	5	4	3	3	4	3	4
ArfGap	10	10	13	10	11	10	12	10
Arg_tRNA_synt_N	2	1	1	1	2	1	2	0
Arginase	2	3	3	3	3	3	5	3
Arginosuc_synth	2	1	1	1	1	2	1	2
ArgK	9	5	5	4	4	6	12	4
ARGLU	2	1	3	1	1	1	2	1
ArgoL1	1	1	1	3	3	4	5	3
ArgoL2	1	1	1	2	1	1	3	2
ArgoMid	1	1	1	1	1	2	2	5
ArgoN	1	2	1	2	1	2	3	1
ARID	8	7	9	10	8	10	5	8
ARL2_Bind_BART	2	2	2	2	2	2	2	2
Arm	26	20	23	26	29	33	38	50
Arm_2	4	3	3	5	6	9	12	4
Arm_3	3	2	2	4	3	4	4	2
Armet	1	1	1	1	3	1	2	2
ARPC4	1	1	1	1	2	1	1	1
Arr-ms	0	0	0	1	0	0	0	0
Arrestin_C	5	6	6	11	8	5	5	6
Arrestin_N	6	10	9	11	8	4	5	5
ARS2	1	1	1	2	2	1	1	2
ArsA_ATPase	4	3	3	3	4	4	3	3
Arv1	1	0	1	1	1	1	0	0
Arylesterase	6	4	6	3	5	4	4	8
Arylsulfotran_N	0	0	0	1	0	0	1	0
ASC	17	23	26	58	12	34	44	20
ASCH	1	1	1	2	1	1	1	1
ASD2	1	1	3	1	1	2	1	1
ASF1_hist_chap	1	3	2	1	1	1	1	0
ASH	11	11	10	11	11	15	13	10
ASL_C2	2	1	1	1	1	1	1	1
Asn_synthase	3	2	2	2	2	2	5	3
Asp	3	4	3	2	3	4	5	2
Asp_Arg_Hydrox	2	1	1	3	1	1	2	3
Asp_protease	9	4	14	6	106	6	3	4
Asp_protease_2	55	20	68	40	244	81	9	96
Asparaginase	2	4	1	1	1	2	3	1
Asparaginase_2	3	4	5	4	4	2	11	7
Aspzincin_M35	1	0	0	1	0	0	0	1
Astacin	75	79	79	86	66	82	91	25
AstE_AspA	4	3	3	3	5	5	7	2
ASXH	1	1	1	1	1	0	1	1
AT_hook	0	0	0	1	0	2	0	0
ATC_hydrolase	0	1	0	1	0	1	0	0
ATE_C	2	0	1	1	1	1	1	1
ATE_N	2	1	1	1	1	0	1	1
ATG_C	2	3	2	3	3	4	6	2
ATG101	1	1	1	1	1	1	1	1
ATG13	1	1	1	1	1	1	1	1
Atg14	4	3	3	4	5	2	8	3
ATG16	13	12	9	13	11	16	8	23
ATG2_CAD	0	0	0	1	1	0	1	1
ATG22	1	0	1	2	1	1	1	0
ATG27	2	2	3	5	7	7	4	8
ATG7_N	1	1	3	1	1	1	1	1
Atg8	5	3	4	4	5	5	5	4
ATP_bind_1	9	8	6	8	7	8	11	7
ATP_bind_3	3	1	2	2	4	3	3	4
ATP_Ca_trans_C	1	0	0	1	1	1	1	1
ATP-cone	2	1	1	1	2	1	1	0
ATP-grasp	10	6	5	5	6	5	14	7
ATP-grasp_2	5	5	4	2	4	5	6	3
ATP-grasp_3	6	8	8	7	5	7	13	7
ATP-grasp_4	1	2	2	3	0	0	0	0
ATP-grasp_5	3	1	1	1	1	2	1	0
ATP-gua_Ptrans	4	2	2	10	16	5	12	3
ATP-gua_PtransN	2	2	2	11	12	5	13	3
ATP-sulfurylase	2	2	1	1	2	1	1	2
ATP-synt	2	5	1	1	1	1	2	1
ATP-synt_A	0	0	0	1	0	0	0	0
ATP-synt_ab	8	5	5	4	8	5	5	3
ATP-synt_ab_C	2	2	1	1	1	1	1	1
ATP-synt_ab_N	6	4	4	4	6	4	3	3
ATP-synt_ab_Xtn	2	1	1	1	2	1	1	1
ATP-synt_C	4	4	3	3	3	3	4	4
ATP-synt_D	1	3	2	1	1	1	3	2
ATP-synt_DE_N	1	2	2	1	1	1	1	2
ATP-synt_F	1	1	1	1	1	1	1	2
ATP-synt_G	1	1	1	1	1	1	1	0
ATP-synt_S1	2	4	4	1	1	1	1	2
ATP11	1	1	1	1	1	1	1	2
ATP12	1	1	1	1	1	1	1	0
ATPase	15	6	6	9	11	6	8	12
ATPase_2	64	20	19	28	13	14	19	36
ATPgrasp_ST	7	7	6	7	6	4	11	10
ATPgrasp_Ter	8	6	6	7	7	6	16	7
ATPgrasp_YheCD	8	5	8	10	7	8	10	8
ATS3	1	1	1	4	1	0	0	1
AtuA	1	1	1	1	1	1	1	2
Atx10homo_assoc	5	3	3	4	5	7	9	4
Autoind_synth	0	0	0	1	0	0	0	0
Autophagy_act_C	1	2	2	2	1	2	2	2
Autophagy_C	1	1	1	1	1	0	1	1
Autophagy_N	1	0	1	1	1	1	1	1
Avl9	5	3	4	4	3	2	5	5
AvrPtoB_bdg	0	0	0	1	0	0	0	0
Ax_dynein_light	1	4	2	3	2	3	3	3
AXE1	3	3	3	4	1	0	2	3
AXH	1	0	0	4	1	1	2	1
AzlD	0	0	0	1	0	0	0	0
AZUL	2	2	2	1	2	1	1	2
B_lectin	1	8	5	4	0	0	0	0
B-block_TFIIIC	1	1	1	1	1	0	2	1
B12-binding	3	2	2	2	2	2	2	1
B12-binding_2	2	1	1	1	1	2	1	1
B2-adapt-app_C	2	2	2	2	2	1	1	4
B3_4	2	2	1	2	3	2	2	1
B5	2	1	1	1	2	1	1	1
B56	2	2	2	2	3	2	3	2
B9-C2	3	3	3	3	3	4	4	4
BAAT_C	5	4	4	5	6	5	4	5
Bac_DNA_binding	0	1	1	1	0	0	0	1
Bac_DnaA	6	1	1	6	3	5	3	0
Bac_globin	0	0	0	1	0	0	0	0
Bac_rhamnosid6H	0	0	0	1	1	1	0	1
Bac_surface_Ag	4	1	1	1	2	1	2	1
BACK	33	31	29	33	32	54	71	124
Bacteriocin_IIc	0	1	1	1	0	1	0	1
Baculo_8kDa	0	0	0	1	0	0	0	0
Baculo_IE-1	0	1	1	2	0	1	1	1
Baculo_PEP_C	1	9	3	4	2	9	8	4
BAG	3	3	3	2	2	3	6	1
BAH	5	5	5	6	6	4	8	7
Band_3_cyto	2	3	3	1	3	4	3	4
Band_7	11	12	12	10	16	13	15	13
Band_7_C	3	2	2	1	1	1	1	1
Bap31	0	2	2	1	1	1	0	0
BAR	7	9	9	8	8	7	11	9
BAR_2	3	2	3	2	3	2	4	4
BAR_3	8	7	8	8	6	5	9	14
BAR_3_WASP_bdg	2	2	2	2	1	1	3	2
BatD	0	0	0	1	0	0	0	1
Bax1-I	5	7	9	4	5	5	5	5
BBE	1	0	0	6	1	1	0	2
BBS1	1	1	1	1	1	2	1	2
BBS2_C	1	3	2	2	3	3	2	4
BBS2_Mid	7	2	3	5	5	6	3	3
BBS2_N	1	1	1	1	1	1	1	1
BCAS2	2	1	1	1	1	1	3	0
BCCT	5	5	4	11	1	4	7	5
BCDHK_Adom3	2	1	2	2	2	2	2	2
BCIP	1	1	1	1	2	2	2	0
BCL_N	1	1	1	1	1	0	1	1
Bcl-2	12	14	12	12	11	12	13	8
BCNT	1	1	1	1	1	1	1	1
Bcr-Abl_Oligo	0	1	0	1	1	0	0	0
BcrAD_BadFG	1	1	1	1	2	1	1	1
BCS1_N	1	1	1	1	0	1	1	1
Beach	6	7	6	7	5	9	8	7
BEN	7	5	6	12	2	13	6	21
BESS	6	0	18	5	8	12	0	1
BET	1	1	1	1	1	1	2	1
Beta_elim_lyase	13	10	11	15	8	7	13	5
Beta_helix	4	4	4	13	5	6	8	22
Beta_lactamase3	2	1	1	2	0	1	1	0
Beta-Casp	5	3	3	4	4	4	5	3
Beta-lactamase	4	2	2	4	3	3	7	8
Beta-TrCP_D	1	2	1	1	1	1	1	1
betaPIX_CC	0	0	1	1	0	1	0	1
BHD_1	1	1	1	1	1	0	1	1
BHD_2	1	1	1	1	1	0	1	0
BHD_3	1	1	2	1	1	1	1	0
BicD	1	3	3	1	2	2	2	4
Big_2	1	0	1	1	1	1	2	0
Bile_Hydr_Trans	2	2	2	2	4	2	2	1
Bin3	2	2	2	1	1	1	1	1
BING4CT	1	1	1	1	2	2	2	1
Biopterin_H	2	7	2	1	1	2	1	2
Biotin_carb_C	9	4	4	4	5	4	7	4
Biotin_carb_N	7	6	6	4	4	4	12	7
Biotin_lipoyl	11	8	8	7	10	6	13	4
Biotin_lipoyl_2	10	4	4	3	11	3	10	3
BiPBP_C	0	1	1	1	1	0	5	1
BIR	4	3	4	3	3	3	3	4
BK_channel_a	2	4	4	3	2	2	1	2
BLM10_mid	1	2	1	1	1	2	0	3
BLOC1_2	3	10	4	3	4	3	11	7
BLOC1S3	1	1	1	1	1	1	2	0
BLUF	0	0	0	1	1	0	0	0
BMP2K_C	0	0	0	1	0	0	0	0
BNIP2	1	0	1	1	1	0	1	0
BNIP3	2	0	0	1	1	1	1	0
BNR	2	0	1	1	1	2	3	4
BolA	9	4	5	20	5	52	12	3
BOP1NT	1	2	1	1	1	1	1	1
BORA_N	2	2	1	1	1	1	1	1
BORCS6	1	2	1	1	1	1	2	1
BORCS8	2	1	1	1	1	0	1	0
Borealin	1	0	1	1	1	1	1	1
BP28CT	1	1	1	2	0	1	2	1
BPL_C	1	0	1	1	1	1	1	0
BPL_LplA_LipB	2	4	2	3	2	2	3	1
BPS	1	1	1	1	0	0	0	0
Branch	2	1	1	1	2	3	3	6
BRAP2	2	2	1	1	1	1	3	1
Bravo_FIGEY	1	2	1	1	2	1	1	2
BRCA-2_helical	1	1	1	1	1	1	1	0
BRCA-2_OB1	1	1	1	1	1	1	1	1
BRCA-2_OB3	1	0	1	1	1	3	0	1
BRCA2	1	1	1	1	1	1	0	1
BRCT	19	13	22	21	16	16	14	12
BRCT_2	16	11	17	17	14	18	11	9
BRD4_CDT	1	2	1	1	0	1	0	0
BRE	1	0	1	1	1	2	1	2
BRE1	1	5	3	3	1	0	7	6
BRF1	1	1	1	1	1	1	1	2
BRICHOS	0	0	0	6	0	5	1	6
Brix	6	5	6	5	5	5	7	6
BRK	2	2	2	2	2	1	1	1
BrkDBD	1	4	4	3	30	3	0	6
BRO1	3	4	3	3	4	5	4	6
BROMI	1	2	1	2	1	1	1	4
Bromo_TP	4	2	3	3	4	2	6	3
Bromodomain	20	19	18	16	22	19	19	22
BSD	3	5	4	3	3	3	2	3
BSMAP	1	0	1	2	1	2	1	1
BT1	1	0	0	1	0	4	2	0
BTAD	32	37	33	7	1	3	3	3
BTB	45	46	49	72	42	75	92	142
BTB_2	38	43	43	33	33	61	58	42
BTB_3	8	8	9	10	12	24	19	14
BTD	1	1	1	1	1	1	1	2
BTG	4	4	4	4	3	4	3	3
BTK	1	1	2	1	1	1	3	4
BtpA	0	0	0	1	1	1	1	1
BUD22	3	4	2	4	2	3	2	0
Bystin	1	2	2	2	1	1	2	1
bZIP_1	26	26	30	26	25	22	36	29
bZIP_2	25	22	23	31	27	24	32	17
bZIP_Maf	16	13	14	14	14	12	21	14
C-C_Bond_Lyase	1	1	1	1	1	1	3	1
c-SKI_SMAD_bind	1	1	1	1	1	1	1	1
C1_1	33	31	34	49	30	37	43	21
C1_2	5	9	8	11	13	9	7	4
C1_4	0	1	0	2	1	7	3	1
C1-set	3	5	4	14	9	12	12	23
C1q	5	2	5	4	7	6	3	8
C2	73	78	77	79	72	74	97	86
C2-C2_1	2	1	1	2	1	1	0	1
C2-set	3	4	0	4	2	2	7	5
C2-set_2	18	16	18	31	37	62	74	189
C4	2	3	3	4	3	2	4	2
C5-epim_C	3	1	1	1	2	1	1	2
C8	3	8	4	3	3	2	4	3
C9orf72-like	1	0	0	1	1	1	1	2
Ca_chan_IQ	12	8	16	5	4	5	2	3
Ca_hom_mod	0	0	0	2	0	1	8	6
CAAP1	1	1	1	1	1	1	2	1
CABIT	2	3	3	2	2	6	1	7
CAC1F_C	0	0	0	1	1	2	1	1
Cactin_mid	1	1	1	1	1	1	1	1
CactinC_cactus	2	2	1	2	2	2	2	1
Cadherin	16	27	18	29	34	37	52	50
Cadherin_2	7	9	9	14	19	17	24	18
Cadherin_3	9	11	9	18	24	18	23	23
Cadherin_C	1	1	1	1	2	2	4	1
Cadherin_C_2	0	0	0	5	1	0	1	0
Cadherin_pro	4	6	3	5	13	4	16	4
Cadherin-like	0	0	0	1	1	1	2	2
CAF1	3	2	2	3	4	5	5	4
CAF1A	1	1	1	1	1	1	1	1
CAF1C_H4-bd	2	2	2	1	2	2	2	0
CAGE1	0	0	0	1	0	0	0	0
CALCOCO1	2	6	5	6	2	8	6	4
Caldesmon	0	0	0	1	0	0	0	0
Caleosin	9	7	7	6	7	6	7	2
Calpain_III	3	3	4	3	4	4	5	3
Calponin	8	7	7	8	5	5	5	2
Calreticulin	2	5	2	2	2	2	2	2
Calsequestrin	4	2	3	7	6	6	5	4
Calx-beta	4	7	6	4	7	6	32	9
CaMKII_AD	1	1	1	1	1	1	2	3
CAMSAP_CC1	1	1	1	1	1	1	1	1
CAMSAP_CH	20	21	22	24	23	22	27	18
CAMSAP_CKK	0	1	1	1	0	1	2	1
CAP	33	46	44	51	31	22	65	32
CAP_C	4	3	3	2	4	4	3	3
CAP_GLY	18	13	16	13	12	12	13	14
CAP_N	1	1	1	1	2	4	2	2
CAP-ZIP_m	1	1	1	1	1	1	0	1
Carb_anhydrase	12	27	29	8	9	10	8	11
Carb_kinase	2	2	2	1	2	1	3	2
CarbopepD_reg_2	5	6	5	4	6	3	9	8
Carboxyl_trans	8	5	5	4	6	4	7	9
CarboxypepD_reg	7	10	8	7	7	6	13	10
CARD	7	6	8	7	7	8	12	36
CARD_2	2	3	3	2	4	7	12	32
CARDB	5	7	4	1	0	0	1	2
CARM1	0	0	0	1	0	0	0	0
Carn_acyltransf	5	12	10	6	6	9	16	7
Cas_Cas4	0	0	0	1	0	1	0	0
CAS_CSE1	1	1	1	1	1	1	1	1
Cas_Csn2	0	0	0	2	0	0	0	0
Cas1_AcylT	3	3	3	4	1	5	3	5
Casc1_N	1	1	1	1	1	1	1	1
CASP_C	1	2	3	1	1	0	2	2
Cast	1	3	1	2	2	1	0	1
Catalase	1	2	2	1	1	2	1	4
Catalase-rel	1	1	1	1	1	2	1	2
Cathelicidins	1	0	1	1	0	0	0	0
CathepsinC_exc	2	1	2	1	1	0	0	0
Cation_ATPase	22	21	23	13	12	10	14	10
Cation_ATPase_C	13	18	18	8	6	3	7	4
Cation_ATPase_N	13	14	16	7	8	4	7	5
Cation_efflux	13	14	12	8	11	10	10	10
CATSPERB	1	0	0	1	1	1	2	1
CATSPERG	1	0	1	1	1	2	1	1
Cauli_VI	2	1	1	3	1	7	1	1
CBAH	6	4	4	7	1	1	2	11
CBF	3	4	3	2	3	3	3	2
CBFB_NFYA	0	0	1	1	1	1	2	1
CBFD_NFYB_HMF	13	22	21	11	17	12	104	19
CbiA	23	6	7	6	6	7	6	2
Cbl_N	1	1	1	2	1	0	0	1
Cbl_N2	1	1	1	1	1	0	0	1
Cbl_N3	1	1	1	2	1	2	0	1
CBM_14	23	33	34	119	20	10	18	8
CBM_2	0	0	0	2	0	2	0	2
CBM_21	5	5	4	2	3	7	9	5
CBM_48	2	1	1	1	3	1	3	3
CBM53	5	5	3	2	3	6	9	5
CBP_BcsQ	2	2	2	2	1	0	1	0
CBP4	1	1	1	1	1	0	0	1
CBS	13	13	12	7	11	5	12	3
CBX7_C	1	1	1	1	1	1	2	2
CC2-LZ	4	5	7	3	4	3	2	3
CC2D2AN-C2	1	1	1	1	0	2	0	1
CCCAP	1	1	1	2	2	4	1	4
CCDC-167	1	1	2	1	1	0	1	1
CCDC106	0	0	0	1	0	0	0	1
Ccdc124	1	1	1	1	1	1	1	0
CCDC14	1	1	1	1	1	1	1	2
CCDC142	1	1	1	1	1	1	1	1
CCDC23	1	0	0	1	1	1	1	0
CCDC24	1	0	0	2	1	0	1	1
CCDC32	1	0	0	1	1	1	0	0
CCDC50_N	1	1	1	1	1	2	0	0
CCDC53	2	1	1	2	2	2	2	1
CCDC66	1	2	2	1	1	2	1	1
CCDC84	1	2	2	1	2	1	1	2
CCDC85	1	1	1	1	1	1	2	1
CCDC92	1	1	2	2	2	3	2	3
CCM2_C	0	0	0	1	0	0	1	1
CcmH	1	0	1	1	0	0	1	0
CCSAP	1	1	2	1	1	1	1	0
CD20	14	7	14	16	11	7	10	15
CD225	21	21	19	9	2	4	7	7
CD34_antigen	0	0	0	4	0	1	2	3
CD36	3	5	5	3	2	4	6	4
CD99L2	0	0	0	1	0	0	0	0
CDC24	3	2	3	2	2	1	2	2
CDC27	1	0	1	1	1	3	1	3
CDC37_C	1	1	1	1	1	1	0	1
CDC37_M	1	1	1	1	1	0	1	3
CDC37_N	1	1	1	1	1	1	1	1
CDC45	1	13	4	7	1	4	1	1
CDC48_2	1	2	1	1	1	2	2	1
CDC48_N	2	2	2	1	2	2	2	3
CDC50	1	1	1	1	1	2	1	1
Cdc6_C	2	2	2	3	2	2	2	1
CDC73_C	1	1	1	1	1	1	2	0
CDC73_N	1	0	1	2	1	1	1	1
CDI	2	2	2	3	2	3	2	2
CDK2AP	1	0	1	1	1	1	1	1
CDK5_activator	1	1	1	1	1	1	1	1
CDO_I	1	5	3	1	1	1	1	3
CDP-OH_P_transf	3	2	4	3	6	5	6	3
CDT1	1	1	1	1	1	1	1	1
CDT1_C	1	1	1	1	1	1	0	0
CDV3	1	1	1	1	1	1	1	2
CEBP_ZZ	4	2	2	3	3	3	3	1
CEBP1_N	1	1	1	1	1	0	0	0
CECR6_TMEM121	3	5	4	1	1	0	5	5
CedA	0	0	0	1	0	0	0	0
cEGF	85	98	107	70	63	114	154	177
Cellulase	3	5	5	3	1	4	6	1
CENP-B_dimeris	0	6	2	1	0	0	1	0
CENP-B_N	22	21	22	4	43	2	3	5
CENP-C_C	1	1	1	1	1	1	0	0
CENP-F_leu_zip	4	6	3	9	9	12	7	14
CENP-F_N	1	2	2	1	1	1	1	0
CENP-L	0	0	0	1	0	0	1	1
CENP-Q	0	0	0	1	0	0	1	0
CENP-S	6	6	6	4	5	5	69	6
CENP-T_C	7	8	7	5	5	5	77	8
CEP1-DNA_bind	1	0	0	1	0	1	0	0
CEP19	2	2	2	1	2	3	2	2
CEP209_CC5	1	1	1	1	1	1	1	2
Cep57_CLD	1	1	1	1	2	1	3	0
Cep57_MT_bd	1	1	1	1	1	3	1	3
CEP63	1	1	0	2	2	2	2	3
CEP76-C2	1	2	1	1	2	2	2	1
Ceramidase	1	2	2	1	0	1	1	3
CFIA_Pcf11	0	0	0	1	0	0	0	0
CG-1	4	3	11	1	0	0	0	2
Cg6151-P	3	1	2	2	2	2	3	2
CGI-121	1	1	1	1	1	1	1	0
CH	36	37	36	46	38	39	57	40
CH_2	5	4	7	9	6	3	5	3
ChaC	3	2	2	5	2	3	2	1
ChAPs	2	2	3	1	3	2	1	2
CHAT	3	1	1	2	2	16	34	241
CHB_HEX_C_1	2	2	2	1	1	1	1	0
CHCH	6	7	7	4	6	8	5	4
CHD5	1	1	1	1	0	1	1	0
CHDCT2	2	3	2	2	2	1	2	2
CHDNT	2	3	3	1	1	0	1	0
CheR	0	0	0	2	3	4	1	1
CHGN	9	15	14	14	14	13	17	17
Chitin_synth_1	0	0	0	2	0	0	0	0
Chitin_synth_2	3	2	2	3	2	1	3	2
Chlam_PMP	0	1	1	1	0	4	0	0
ChlI	4	1	1	1	2	1	1	1
Chlorophyllase2	3	1	1	2	1	1	3	2
Choline_kinase	4	7	6	5	2	4	6	4
Choline_transpo	2	2	2	3	2	3	2	4
CHORD	1	1	1	1	2	2	1	1
Chordopox_A13L	0	0	1	1	0	0	0	0
Chordopox_A33R	0	0	0	2	1	1	1	2
Chorein_N	5	3	6	5	6	3	9	4
Chromo	20	27	19	36	19	21	13	16
Chromo_shadow	2	3	1	1	1	1	2	0
Chromosome_seg	1	1	1	1	0	1	1	0
CHZ	0	0	0	1	0	0	1	0
CIA30	2	1	1	2	4	4	1	0
CIAPIN1	1	1	1	1	1	1	1	1
Cid2	1	0	1	1	1	1	1	1
CIDE-N	10	2	7	1	2	3	2	1
CiPC	0	0	0	1	1	1	1	0
Cir_N	3	3	3	2	2	2	3	2
CitMHS	3	3	2	2	8	6	6	5
Citrate_bind	2	1	1	1	1	2	1	2
Citrate_synt	4	2	2	3	3	2	3	2
CK1gamma_C	1	1	1	1	1	1	1	1
CLAMP	2	0	2	2	3	3	2	2
CLASP_N	8	8	9	13	10	13	11	9
Clat_adaptor_s	11	9	10	10	9	9	11	5
Clathrin	12	15	14	12	10	11	13	10
Clathrin_H_link	1	1	1	2	2	1	2	2
Clathrin_lg_ch	1	1	1	1	2	1	1	1
Clathrin_propel	1	1	2	1	1	1	1	1
Claudin_2	15	10	12	38	10	14	3	1
Claudin_3	1	0	1	6	2	5	2	1
Clc-like	1	0	1	2	1	2	0	1
CLIP1_ZNF	1	0	0	1	1	0	1	0
CLP_protease	1	1	1	1	3	1	2	1
Clp1	1	1	1	1	1	0	1	0
CLP1_N	1	1	1	1	1	1	1	1
CLP1_P	7	4	5	5	1	3	4	2
ClpB_D2-small	6	2	2	2	5	2	2	3
ClpS	1	0	1	1	1	0	0	1
CLPTM1	2	2	2	2	2	3	3	4
CLTH	4	4	4	4	4	4	6	4
CLU	1	1	1	1	1	2	2	2
CLU_N	1	1	1	1	1	1	1	1
Cluap1	2	2	1	1	1	1	2	1
CMAS	12	5	5	13	12	14	8	13
Cmc1	3	3	3	1	4	5	4	0
CmcI	2	1	1	2	1	1	1	6
CMS1	6	7	6	4	3	6	3	2
CN_hydrolase	6	7	5	2	6	7	10	9
Cnd1	32	26	35	37	32	36	39	31
Cnd1_N	1	1	1	2	1	1	1	1
Cnd2	1	1	1	2	2	1	0	2
Cnd3	2	4	4	2	3	3	3	4
CNH	8	9	8	7	8	7	7	8
cNMP_binding	20	19	20	23	23	22	38	33
Cnn_1N	2	3	1	4	3	1	3	5
CNOT1_CAF1_bind	1	1	1	1	1	1	1	1
CNOT1_HEAT	1	1	1	1	1	0	1	0
CNOT1_TTP_bind	1	1	1	1	1	1	1	1
CNPase	1	1	1	1	1	1	0	1
CNRIP1	3	2	3	1	1	1	1	1
CoA_binding	3	2	2	3	4	1	3	4
CoA_binding_2	0	1	1	2	1	1	1	2
CoA_trans	2	4	2	1	1	2	2	1
CoA_transf_3	3	3	3	3	3	4	2	2
Coa1	3	3	3	2	2	2	2	1
CoaE	3	1	1	1	3	1	3	2
Coatamer_beta_C	1	1	1	1	1	1	2	0
Coatomer_b_Cpla	1	1	1	1	1	2	2	0
Coatomer_E	4	4	3	4	3	3	5	2
Coatomer_g_Cpla	1	1	1	1	1	1	1	1
Coatomer_WDAD	7	8	5	7	9	10	10	11
Cob_adeno_trans	1	1	2	1	1	1	3	1
COBRA1	1	1	1	1	1	1	1	1
CobT	0	1	0	1	0	0	0	0
cobW	10	5	6	8	4	5	13	5
CobW_C	2	1	1	2	1	1	0	0
Codanin-1_C	1	0	1	1	1	1	1	2
COE1_DBD	1	2	1	2	1	2	1	1
COE1_HLH	1	1	1	1	0	1	1	1
COesterase	3	2	3	4	7	6	26	10
Cofilin_ADF	5	5	5	6	7	6	12	8
COG2	3	4	3	2	4	3	2	0
COG4	1	1	2	1	2	1	1	1
COG5	1	3	2	1	1	1	2	2
COG6	1	3	1	1	1	1	4	1
COG7	1	3	1	1	1	1	2	3
Cohesin_HEAT	2	2	1	2	1	3	2	3
Cohesin_load	1	2	1	1	2	3	1	1
Coilin_N	1	1	0	2	1	1	1	1
COLFI	8	6	7	12	7	12	35	85
Colipase_C	0	1	0	1	0	0	2	0
Collagen	37	47	41	58	54	97	90	185
ComA	0	0	0	1	0	0	0	0
Comm	1	1	2	3	2	0	2	0
COMM_domain	10	12	11	6	10	7	11	6
COMMD1_N	1	1	1	1	1	2	1	1
COMP	1	1	0	1	1	2	0	0
COMPASS-Shg1	1	1	1	1	1	2	1	0
Complex1_30kDa	1	2	1	1	1	2	2	1
Complex1_49kDa	2	1	1	1	1	1	2	0
Complex1_51K	2	1	1	1	0	1	2	2
Complex1_LYR	5	5	5	4	8	6	8	6
Complex1_LYR_2	3	3	4	1	5	2	5	4
Condensation	6	1	2	4	5	0	2	3
Conotoxin	0	0	0	1	0	0	0	1
Cons_hypoth95	8	4	5	2	8	1	5	3
COP-gamma_platf	1	1	1	1	1	1	1	2
CopC	0	0	0	1	0	0	0	0
COPI_C	1	1	1	1	1	2	2	2
COPIIcoated_ERV	3	2	2	3	3	4	3	3
Copine	3	5	4	6	6	6	6	5
Copper-fist	0	0	0	1	0	0	0	0
Coprogen_oxidas	2	1	1	2	2	1	2	1
Coq4	1	1	1	1	1	1	1	1
COR	10	14	17	8	6	6	7	82
Cor1	2	1	1	1	2	2	1	0
CorA	0	0	0	1	2	0	8	1
Cornichon	2	1	2	1	2	1	2	0
Cornifin	0	11	5	3	5	1	40	0
Corona_S2	0	0	0	1	0	0	0	0
CortBP2	1	0	1	2	1	1	0	1
Costars	1	1	1	2	2	2	3	1
COX15-CtaA	2	1	1	2	2	1	1	2
COX5B	1	1	1	1	1	1	2	1
COX6A	1	1	1	1	2	2	1	0
CP2	2	3	2	2	2	2	2	2
CPL	1	1	1	2	1	2	1	1
Cpn10	1	2	2	1	1	1	1	2
Cpn60_TCP1	14	19	15	12	14	19	21	17
CppA_N	1	0	1	1	1	1	1	0
CPSase_L_D2	10	7	7	9	9	5	18	16
CPSase_L_D3	2	1	1	1	2	2	4	4
CPSase_sm_chain	3	1	1	1	2	3	4	2
CPSF_A	4	7	6	4	5	4	3	5
CPSF100_C	1	1	1	1	1	1	1	0
CPSF73-100_C	1	1	1	1	1	1	1	2
CPT	1	1	1	2	2	0	1	1
CPT_N	1	1	1	1	1	1	2	1
CpXC	0	0	0	6	1	1	0	0
CR6_interact	1	1	1	1	1	1	0	1
CRAL_TRIO	12	5	11	14	12	12	14	4
CRAL_TRIO_2	10	6	6	12	8	5	10	3
CRAL_TRIO_N	4	4	4	3	3	3	3	1
Creatinase_N	3	0	2	3	3	2	4	3
Creatinase_N_2	3	1	2	2	2	2	2	3
CREPT	2	2	2	5	2	2	3	1
CRIM	1	1	1	1	1	1	1	0
CRM1_C	2	2	2	3	1	3	2	1
CRT-like	3	4	5	2	2	4	5	1
CS	11	7	11	11	11	9	12	9
Csa1	0	0	0	1	0	0	0	0
CSD	3	4	3	4	4	4	3	8
Cse1	1	1	1	2	2	1	3	2
CsiD	1	0	0	2	1	1	0	0
CSN8_PSD8_EIF3K	3	4	5	5	5	5	7	4
CSTF_C	4	1	1	1	1	0	1	1
CSTF1_dimer	1	1	1	1	1	1	1	2
CSTF2_hinge	1	1	1	1	1	1	0	1
CtaG_Cox11	1	1	1	1	1	1	1	2
CTD	1	0	0	1	0	0	11	0
CTD_bind	5	5	5	4	5	5	5	3
Ctf8	1	1	1	1	0	1	1	1
CTNNBL	1	1	1	1	1	1	1	0
CTP_synth_N	3	2	3	3	1	1	2	1
CTP_transf_1	1	1	1	1	1	4	1	1
CTP_transf_like	4	5	5	4	6	4	4	4
Ctr	2	2	2	5	3	3	4	4
CTU2	1	2	3	1	1	1	1	0
Cu-oxidase	5	5	5	6	2	4	0	4
Cu-oxidase_2	5	6	6	6	5	9	3	8
Cu-oxidase_3	5	4	5	6	5	10	4	9
Cu2_monoox_C	2	1	1	3	4	12	8	11
Cu2_monooxygen	2	2	1	4	4	5	8	5
CUB	29	39	40	49	52	93	69	156
CUB_2	6	11	7	11	8	21	18	23
CUE	7	5	7	9	9	20	6	7
Cullin	8	9	10	6	7	7	11	9
Cullin_binding	2	3	2	1	3	3	0	4
Cullin_Nedd8	4	4	4	4	3	4	5	2
Cupin_2	3	4	3	4	6	3	6	4
Cupin_4	7	9	9	6	10	11	12	11
Cupin_8	15	15	15	25	33	36	33	22
Cupredoxin_1	2	1	1	2	1	0	0	0
CUT	1	0	1	3	1	1	2	1
Cut8	1	0	0	1	0	1	1	2
CutC	1	1	1	1	1	1	1	0
CWC25	1	1	1	2	1	1	1	1
Cwf_Cwc_15	3	7	2	1	1	1	1	1
cwf21	1	2	2	1	2	1	2	1
CwfJ_C_1	2	2	2	1	2	2	2	4
CX9C	2	2	1	1	4	2	1	2
CXCXC	2	3	2	2	0	1	1	0
CybS	1	1	1	1	1	1	1	1
Cyclase	1	0	0	3	2	1	3	2
Cyclin	1	2	2	2	2	2	2	3
Cyclin_C	10	7	6	8	9	8	10	8
Cyclin_C_2	3	3	2	2	3	2	2	0
Cyclin_N	18	16	15	18	20	18	22	15
Cys_knot	11	9	9	11	13	13	3	2
Cys_Met_Meta_PP	8	4	6	7	5	4	11	5
Cys_rich_FGFR	1	2	3	1	1	1	1	2
Cystatin	7	8	8	2	3	5	3	3
CYSTM	1	2	1	1	1	0	0	0
Cyt_c_ox_IV	0	0	0	1	0	0	0	0
Cyt-b5	8	6	9	8	9	8	20	11
Cytidylate_kin	3	2	1	1	3	3	1	3
Cytidylate_kin2	1	0	0	1	2	0	1	0
Cyto_heme_lyase	1	1	1	1	1	1	2	0
Cytochrom_B558a	1	1	1	1	1	1	1	1
Cytochrom_B561	7	5	6	7	4	5	4	2
Cytochrom_C	2	1	0	1	1	1	4	0
Cytochrom_C1	1	1	1	1	1	1	1	0
Cytochrom_D1	7	2	5	4	5	4	4	1
CytochromB561_N	1	2	1	2	1	1	1	3
Cytochrome_CBB3	3	2	1	2	1	2	3	0
D-ser_dehydrat	0	0	0	1	0	0	1	0
DAD	1	1	1	1	1	1	1	0
DAG_kinase_N	1	1	1	1	1	1	1	1
DAG1	6	6	7	12	6	9	5	3
DAGAT	6	4	3	4	3	3	8	5
DAGK_acc	5	5	4	5	5	2	7	7
DAGK_cat	9	7	10	8	7	6	12	9
Dak1	2	1	1	1	1	2	1	1
Dak2	1	1	2	1	1	1	0	0
Dala_Dala_lig_C	9	6	7	8	7	5	13	9
Dala_Dala_lig_N	0	0	0	1	1	0	0	0
DALR_1	4	2	2	2	2	1	2	2
Dam	0	0	0	15	0	0	0	3
DAN	29	20	17	26	17	23	6	7
DAO	36	18	23	36	32	34	42	34
DAP	1	1	1	1	1	0	1	1
DAP3	1	1	1	2	1	2	1	1
DASH_Hsk3	0	0	0	1	0	1	0	0
DAZAP2	0	0	0	1	1	0	1	0
DBB	1	1	1	1	1	2	0	0
DBINO	2	2	2	2	1	1	1	2
DBP10CT	1	0	0	1	1	1	1	1
DC_STAMP	1	3	2	2	1	1	0	1
dCache_1	6	6	6	6	4	5	7	8
DCAF15_WD40	1	0	1	2	1	1	1	0
DCB	3	4	3	3	3	2	4	3
Dcc1	1	2	1	1	1	1	4	2
dCMP_cyt_deam_1	5	5	3	5	7	6	8	10
dCMP_cyt_deam_2	0	1	1	1	1	2	1	0
DCP1	2	0	1	1	0	1	1	1
DCP2	1	1	1	1	1	1	0	1
DcpS	1	1	1	1	1	1	1	1
DcpS_C	4	2	4	4	5	4	7	3
DctQ	0	1	0	1	0	0	0	0
DCX	6	8	9	4	6	6	7	6
DDA1	1	0	1	1	1	0	1	0
DDDD	2	2	2	1	1	2	1	1
DDE_1	172	198	223	10	118	10	5	24
DDE_3	365	462	481	16	31	16	6	17
DDE_Tnp_1	28	28	37	17	7	34	4	17
DDE_Tnp_1_2	0	4	1	3	0	4	0	0
DDE_Tnp_1_7	116	353	165	9	34	65	5	46
DDE_Tnp_4	95	324	175	34	83	73	20	59
DDE_Tnp_IS1595	25	65	27	12	1	5	16	7
DDE_Tnp_IS66	0	3	2	2	0	0	0	0
DDE_Tnp_ISAZ013	1	17	7	2	15	1	0	0
DDE_Tnp_ISL3	1	1	1	1	0	0	0	3
dDENN	5	3	5	5	4	3	3	0
DDHD	3	3	3	4	4	3	3	1
DDOST_48kD	2	1	1	1	1	2	1	1
DDRGK	1	0	1	2	1	2	1	1
DDT	2	2	2	1	2	3	6	4
DEAD	99	87	88	102	70	119	82	98
DEAD_2	6	3	4	4	5	5	3	3
DEAD_assoc	0	0	0	1	0	0	0	0
Death	198	71	125	14	16	20	20	132
DED	17	23	52	4	4	4	12	37
Defensin_3	0	0	0	1	1	0	0	0
DegT_DnrJ_EryC1	6	2	3	5	4	4	10	4
DEK_C	1	2	1	2	3	3	3	1
DENN	7	8	9	7	8	6	6	8
DeoC	1	1	1	1	2	1	1	1
DeoRC	0	0	0	1	2	0	1	0
DEP	8	8	7	9	9	10	11	7
DER1	3	4	4	1	2	3	1	2
DERM	0	0	0	3	0	0	5	6
Det1	1	1	1	1	1	2	1	1
DFF40	2	1	1	1	1	1	1	1
DFP	2	1	1	1	2	1	2	0
DFRP_C	2	2	2	1	2	2	2	2
DHC_N1	7	7	8	14	10	8	15	11
DHC_N2	11	16	12	21	18	12	23	22
DHDPS	2	1	1	2	1	1	3	1
DHH	2	1	1	1	3	1	1	1
DHHA1	4	2	2	1	3	1	1	1
DHHC	15	14	14	14	12	16	15	8
DHO_dh	4	3	2	4	3	2	3	3
DHQ_synthase	0	0	0	1	0	1	2	1
DHR-2	4	5	5	6	5	6	8	5
Dicer_dimer	2	3	2	1	1	2	1	3
Dickkopf_N	2	5	5	5	5	4	6	4
Dicty_CAR	6	3	5	11	8	3	9	8
Dicty_REP	0	0	0	1	0	0	0	0
DIE2_ALG10	1	1	1	2	2	1	2	0
DIL	3	2	3	3	2	4	3	4
DIM1	2	2	3	3	2	2	3	1
Dimer_Tnp_hAT	296	549	376	11	44	52	21	27
Dimerisation	3	0	0	1	0	0	2	1
Dimerisation2	0	3	3	1	0	0	7	1
DIOX_N	4	4	4	6	2	7	6	5
Diphthami_syn_2	1	1	2	1	1	2	1	2
Diphthamide_syn	2	2	3	2	3	1	2	3
Disaggr_repeat	0	0	0	1	1	0	0	0
Dishevelled	0	0	1	1	1	0	1	0
Disintegrin	7	11	16	13	8	12	5	6
DIT1_PvcA	0	0	0	2	0	5	0	0
DivIC	1	3	1	2	2	2	7	3
DIX	1	1	3	3	3	3	4	2
DJ-1_PfpI	5	7	7	4	6	4	6	3
DKCLD	1	1	1	1	0	1	1	0
DLD	1	1	1	1	2	2	1	2
DLH	6	5	6	8	11	9	12	10
DLIC	3	1	2	2	1	2	2	1
DM	6	6	5	7	11	9	12	7
DMA	2	2	2	4	6	6	2	8
DMAP_binding	3	0	2	3	3	2	2	2
DMAP1	1	1	1	2	2	1	1	0
DMPK_coil	2	1	1	2	1	1	1	0
DNA_alkylation	1	0	1	1	1	1	1	0
DNA_gyraseB	3	2	2	1	2	1	3	1
DNA_ligase_A_C	4	1	1	4	3	1	3	4
DNA_ligase_A_M	8	5	7	4	5	2	4	6
DNA_ligase_A_N	3	1	3	5	4	2	3	3
DNA_ligase_IV	1	1	1	1	1	2	1	1
DNA_methylase	4	2	2	3	4	2	3	4
DNA_mis_repair	4	2	3	2	4	2	5	2
DNA_photolyase	4	1	1	2	1	4	10	4
DNA_pol_A	2	3	2	3	3	2	3	2
DNA_pol_A_exo1	6	6	6	10	8	11	9	15
DNA_pol_alpha_N	1	1	1	2	1	1	1	0
DNA_pol_B	4	7	4	5	5	7	6	8
DNA_pol_B_2	2	3	3	4	6	4	2	13
DNA_pol_B_exo1	6	4	4	5	4	4	5	5
DNA_pol_B_exo2	1	1	1	1	1	1	1	1
DNA_pol_B_palm	2	0	0	2	2	2	2	2
DNA_pol_B_thumb	2	0	0	2	3	2	2	2
DNA_pol_delta_4	0	0	0	1	1	1	1	1
DNA_pol_E_B	3	3	3	3	4	3	4	4
DNA_pol_lambd_f	2	0	0	2	3	4	2	4
DNA_pol_phi	4	32	4	2	1	1	3	1
DNA_pol3_delta	1	2	2	1	3	1	1	2
DNA_pol3_delta2	6	7	7	4	7	3	4	4
DNA_primase_lrg	1	1	1	1	1	2	2	2
DNA_primase_S	3	1	1	1	1	1	1	5
DNA_repr_REX1B	1	1	1	1	1	1	2	1
DNA_topoisoIV	3	2	2	1	2	1	2	2
Dna2	1	1	1	1	1	1	1	1
DnaB_2	0	0	0	1	2	0	0	0
DnaB_C	5	4	2	4	4	4	4	2
DnaJ	38	40	47	37	36	34	46	43
DnaJ_C	8	10	9	6	8	7	9	10
DnaJ_CXXCXGXG	5	3	2	3	5	4	4	1
DNase_II	1	1	1	2	1	3	0	0
DND1_DSRM	3	6	5	5	3	6	6	5
dNK	2	3	3	2	3	3	4	4
DNMT1-RFD	1	1	1	1	1	1	1	0
DOCK_N	2	2	2	4	2	1	4	4
DOCK-C2	5	3	4	4	5	3	6	8
DOMON	5	5	4	3	4	7	13	22
Dopey_N	1	1	2	2	1	1	4	4
DOR	1	0	0	1	1	1	1	1
Dor1	2	2	3	2	2	3	3	1
DOT1	2	2	3	3	3	2	3	6
DotD	0	0	0	1	0	0	0	0
DoxX	0	0	0	1	0	0	0	0
DoxX_2	0	1	1	1	1	1	1	0
DP	1	1	1	1	1	1	1	1
Dpoe2NT	1	0	0	1	1	1	1	0
DPPIV_N	5	7	8	3	1	3	5	4
Dpy-30	5	6	5	7	5	4	4	2
Dpy19	2	4	3	2	2	3	3	5
Drc1-Sld2	1	1	1	1	1	0	0	1
Drf_FH3	2	4	3	4	4	5	5	4
Drf_GBD	2	3	4	4	5	4	11	3
DRIM	2	2	1	2	1	2	3	1
DRMBL	1	1	1	3	2	2	3	2
DRY_EERY	2	2	2	2	2	2	2	2
DS	3	0	0	1	2	1	1	1
DSBA	4	5	5	2	2	2	5	3
dsDNA_bind	1	1	1	1	1	0	1	1
Dsh_C	0	0	0	1	0	1	0	1
DSHCT	2	2	2	3	2	1	2	3
DSL	6	13	15	13	10	15	12	6
DSPc	39	39	40	35	39	37	50	26
DSPn	1	1	3	2	1	1	2	2
DsrC	0	0	0	1	0	0	0	0
dsrm	10	11	11	15	14	20	18	13
DTW	1	0	1	1	1	0	2	1
DUF1011	3	1	1	2	2	2	3	3
DUF1041	2	1	1	2	2	2	2	2
DUF1053	1	1	1	1	1	1	1	1
DUF108	1	2	1	1	1	1	1	0
DUF1081	2	2	2	2	4	3	1	1
DUF1086	2	2	2	1	1	1	0	2
DUF1087	1	1	1	1	1	1	1	0
DUF1088	1	1	1	1	1	2	0	0
DUF1103	2	3	2	1	1	0	1	2
DUF1115	2	2	2	2	2	3	5	1
DUF1126	3	2	3	3	4	3	4	4
DUF1168	1	0	1	1	1	1	1	1
DUF1180	1	1	1	1	1	1	1	3
DUF1191	1	1	1	3	0	1	1	2
DUF1194	1	0	0	3	1	0	4	5
DUF1211	11	27	26	8	1	1	2	2
DUF1232	1	1	0	1	1	1	1	0
DUF1258	1	2	3	14	0	13	0	21
DUF1280	13	20	31	4	0	4	3	2
DUF1294	5	1	1	1	1	2	0	0
DUF1295	5	4	5	7	3	7	5	3
DUF1298	1	1	1	4	2	3	4	9
DUF1308	1	1	1	1	1	1	0	1
DUF1325	2	1	1	2	2	3	6	3
DUF1356	3	2	2	2	2	2	1	1
DUF1358	1	0	1	1	1	1	1	1
DUF1394	2	2	2	2	2	3	3	1
DUF1445	1	2	1	1	2	1	2	1
DUF148	0	1	2	1	0	1	0	0
DUF1487	1	1	0	3	1	2	4	0
DUF1510	6	39	9	16	5	18	0	4
DUF155	1	1	1	1	1	2	1	2
DUF1573	2	0	1	1	0	4	4	0
DUF16	0	3	2	5	3	1	2	3
DUF1604	1	1	1	2	1	2	1	0
DUF1619	1	1	1	1	2	4	0	0
DUF1620	1	1	1	1	1	1	3	2
DUF1624	3	0	2	2	0	1	1	0
DUF1640	0	0	0	2	0	2	2	3
DUF1644	0	0	0	1	0	3	0	0
DUF1664	6	12	6	6	4	10	12	7
DUF1674	0	1	1	1	1	1	0	0
DUF1679	3	3	3	2	1	0	0	1
DUF1681	1	0	1	2	1	1	1	1
DUF1682	2	1	1	1	2	2	1	1
DUF1690	1	1	1	1	0	0	0	0
DUF1712	1	1	1	1	1	1	3	1
DUF1726	1	2	2	1	1	2	1	1
DUF1731	1	1	1	1	1	0	1	2
DUF1736	3	2	2	3	3	3	3	2
DUF1741	1	2	1	1	1	1	1	2
DUF1744	1	1	1	1	1	2	2	1
DUF1751	1	2	2	1	3	2	1	1
DUF1754	1	0	0	2	1	1	1	0
DUF1758	51	25	36	19	71	65	0	45
DUF1759	59	69	39	37	92	84	16	172
DUF1768	0	1	1	1	2	2	1	2
DUF1771	1	0	1	1	1	0	1	0
DUF1772	2	1	1	5	4	7	5	2
DUF1776	3	5	3	2	6	4	9	2
DUF1777	3	2	3	2	2	4	3	1
DUF1834	0	0	0	1	0	0	0	0
DUF1866	2	1	1	1	2	2	1	0
DUF1871	0	0	0	1	0	0	0	0
DUF1897	1	1	1	1	1	1	0	1
DUF1899	2	2	2	3	2	3	3	3
DUF19	0	0	0	1	0	0	0	0
DUF1904	0	0	0	3	0	0	0	0
DUF1908	1	1	1	1	0	1	2	2
DUF1917	0	0	0	1	0	1	0	0
DUF1943	2	4	2	4	10	8	4	4
DUF1947	1	0	1	1	0	0	0	0
DUF1967	0	0	0	1	0	0	1	0
DUF1971	0	0	0	1	0	0	0	1
DUF1977	1	2	2	1	1	0	1	0
DUF1981	3	4	3	4	4	2	3	2
DUF1986	13	13	14	59	38	46	50	22
DUF2003	1	1	1	1	1	1	2	1
DUF2012	2	2	2	2	2	2	2	2
DUF2013	1	0	1	1	1	1	1	0
DUF2039	1	1	1	1	1	2	3	0
DUF2043	1	1	1	1	1	1	1	1
DUF2045	2	1	1	1	2	3	1	1
DUF2046	1	2	1	2	1	1	3	1
DUF2048	1	3	3	1	1	1	1	2
DUF2052	2	2	1	1	1	0	1	1
DUF2053	1	2	1	1	1	1	2	0
DUF2075	3	1	3	3	5	11	2	15
DUF21	3	3	3	2	2	1	2	1
DUF2116	0	0	0	1	0	0	0	0
DUF2142	0	0	0	1	0	0	0	0
DUF2151	2	3	4	2	1	2	2	2
DUF2152	2	3	2	1	3	3	5	2
DUF2181	1	2	1	1	1	3	1	1
DUF2204	0	0	0	1	0	0	0	0
DUF2207	4	2	1	4	1	3	1	4
DUF2226	0	0	0	1	0	0	0	0
DUF2228	1	1	1	1	1	2	2	0
DUF2240	0	0	0	1	0	0	0	0
DUF229	9	18	19	31	22	14	35	5
DUF2315	1	1	1	1	1	0	1	0
DUF2334	1	1	1	1	0	0	0	0
DUF2340	0	1	1	2	1	1	1	1
DUF2345	0	4	0	1	0	1	13	1
DUF2347	3	2	3	3	2	2	3	3
DUF2353	1	2	3	3	2	2	2	9
DUF2362	1	2	1	1	1	1	0	0
DUF2363	1	1	1	1	1	1	1	1
DUF2368	1	1	0	1	1	1	1	0
DUF2369	5	2	3	5	2	2	2	12
DUF2371	0	0	1	1	0	0	0	0
DUF2373	1	0	0	1	1	1	1	0
DUF2405	1	0	0	1	1	1	0	0
DUF2407	1	18	3	1	3	2	4	2
DUF2410	1	1	1	1	1	1	0	0
DUF2423	1	0	0	1	0	1	1	0
DUF2428	2	2	2	2	2	1	2	0
DUF2431	2	1	1	2	1	1	2	1
DUF2439	1	0	1	1	0	0	0	0
DUF2451	1	2	2	3	2	2	1	1
DUF2464	1	2	1	1	1	1	0	2
DUF2465	1	1	1	1	1	1	1	2
DUF2475	2	2	2	2	4	4	5	2
DUF2615	1	1	1	1	1	1	1	1
DUF2617	0	0	0	1	0	0	0	0
DUF2650	0	1	1	1	1	0	1	0
DUF2678	2	1	1	1	1	1	2	1
DUF2738	21	0	12	1	0	0	1	0
DUF2806	0	0	0	1	0	0	0	0
DUF2818	0	0	0	1	0	0	0	0
DUF2841	0	0	0	2	0	3	0	1
DUF2870	1	1	1	1	1	1	1	1
DUF296	1	1	1	1	1	1	1	1
DUF2960	0	0	0	1	0	0	0	0
DUF2961	14	49	5	2	3	3	1	3
DUF2974	3	5	6	2	0	0	1	0
DUF3029	0	0	0	1	0	0	0	0
DUF3043	0	0	0	1	0	0	0	0
DUF3052	0	0	0	1	0	0	0	0
DUF3098	0	0	0	1	0	0	0	0
DUF3109	0	0	0	1	0	0	0	0
DUF3129	0	0	0	1	0	1	0	0
DUF316	3	1	0	7	5	1	4	5
DUF3185	0	0	0	1	0	0	0	0
DUF3218	0	0	0	1	0	0	0	0
DUF3243	0	0	0	1	0	0	0	0
DUF3276	1	3	1	1	0	1	1	1
DUF3287	0	0	1	1	0	0	0	0
DUF3337	1	2	2	1	1	1	2	2
DUF3338	1	1	1	1	2	1	1	1
DUF3342	2	3	3	4	3	4	7	11
DUF3350	1	1	1	1	1	0	0	0
DUF3361	2	2	1	1	4	4	4	1
DUF3377	0	0	1	2	1	0	2	3
DUF3381	1	1	0	1	1	1	1	1
DUF3384	1	2	1	1	1	2	1	2
DUF3385	4	2	1	3	3	3	5	4
DUF3395	1	6	7	1	1	1	1	1
DUF3398	2	2	3	2	2	2	3	3
DUF3402	2	1	1	1	1	1	0	1
DUF3421	0	0	0	2	0	0	1	1
DUF3429	0	0	0	1	1	0	1	1
DUF3437	1	1	1	1	1	0	0	2
DUF3439	1	0	0	1	0	0	0	0
DUF3441	1	2	1	1	1	1	0	0
DUF3445	1	1	1	1	1	1	1	0
DUF3447	1	25	1	2	1	0	0	1
DUF3449	1	1	1	1	1	1	2	1
DUF3450	3	2	1	5	2	3	5	5
DUF3452	1	1	1	1	2	0	1	2
DUF3453	1	0	1	1	0	1	1	2
DUF3456	5	7	4	5	5	6	8	5
DUF3480	1	1	1	2	2	1	1	3
DUF3504	1	1	1	8	1	3	7	33
DUF3510	1	1	1	1	1	1	1	1
DUF3512	1	1	1	1	1	1	2	1
DUF3513	1	1	1	1	1	1	1	1
DUF3523	1	1	1	1	1	1	1	2
DUF3524	1	2	1	1	1	2	1	1
DUF3534	3	5	4	3	2	4	1	1
DUF3535	1	2	1	1	1	1	1	2
DUF3538	1	1	2	1	1	1	1	2
DUF3541	0	0	0	1	0	0	0	0
DUF3543	0	0	0	1	0	0	1	1
DUF3546	1	1	1	1	1	1	1	1
DUF3548	1	0	1	1	1	1	1	2
DUF3552	2	2	2	8	1	1	12	3
DUF3568	0	0	0	1	0	0	0	0
DUF3583	1	1	1	1	0	2	1	3
DUF3584	1	2	2	5	4	4	1	6
DUF3585	4	3	4	3	3	3	3	6
DUF3591	1	1	3	1	1	1	1	1
DUF3611	0	0	0	1	0	0	0	0
DUF3636	0	0	0	1	0	0	0	0
DUF3652	1	1	1	2	1	1	1	1
DUF3657	1	1	1	1	1	1	1	1
DUF3668	1	1	1	1	1	1	1	1
DUF3677	1	2	1	1	1	1	1	2
DUF3678	0	0	0	1	0	0	0	0
DUF3689	1	1	1	1	1	2	1	1
DUF3694	2	2	3	2	2	2	2	2
DUF3695	1	0	1	1	1	1	2	2
DUF3700	1	1	1	1	1	1	2	0
DUF3704	0	0	0	1	0	0	0	0
DUF3713	0	0	0	1	0	0	0	0
DUF3719	1	1	1	1	1	1	2	1
DUF3730	1	1	2	1	1	1	1	0
DUF3737	0	0	0	2	0	0	1	0
DUF3739	0	0	0	2	0	0	0	0
DUF3740	0	0	0	1	0	0	0	0
DUF3749	1	0	0	1	0	1	1	0
DUF3752	1	0	1	1	1	1	1	1
DUF3754	1	1	1	1	2	2	1	0
DUF3767	1	1	1	1	1	1	1	1
DUF3794	0	0	0	1	0	0	1	0
DUF3808	2	3	4	2	2	2	3	7
DUF3819	1	1	1	1	1	0	1	0
DUF382	1	1	1	1	1	1	1	1
DUF3827	0	0	2	1	1	2	1	1
DUF383	1	1	1	1	1	2	2	1
DUF384	1	1	1	1	1	1	2	1
DUF3856	4	10	10	1	1	3	39	21
DUF3883	2	1	1	1	1	1	0	0
DUF3971	1	0	0	1	0	0	0	0
DUF3973	0	0	0	1	0	0	0	0
DUF3987	1	0	0	19	0	7	1	8
DUF4042	1	2	1	1	1	0	1	1
DUF4061	1	1	1	1	1	1	1	1
DUF4062	5	8	8	7	9	8	13	7
DUF4064	0	1	1	2	0	1	1	0
DUF4071	1	1	1	1	1	1	0	0
DUF4078	2	1	1	1	1	2	1	1
DUF4108	0	0	0	1	0	0	0	0
DUF4116	0	32	34	1	1	0	0	0
DUF4139	2	1	1	1	1	6	0	0
DUF4140	2	1	1	1	2	2	0	0
DUF4147	1	1	1	1	1	1	2	0
DUF4149	0	0	0	1	2	2	2	1
DUF4162	0	0	1	1	0	1	0	0
DUF4177	0	0	0	1	0	0	0	0
DUF4179	0	0	0	1	0	0	0	0
DUF418	0	0	0	1	0	0	0	0
DUF4187	2	1	2	1	1	2	1	0
DUF4200	3	1	2	6	4	3	6	7
DUF4201	3	4	3	5	6	5	3	3
DUF4203	3	3	3	4	3	3	5	5
DUF4205	0	0	0	2	3	3	4	3
DUF4207	2	2	2	1	3	1	3	1
DUF4208	1	2	1	1	0	1	0	1
DUF4210	1	1	1	1	0	1	1	1
DUF4217	4	4	4	3	3	2	4	2
DUF4218	47	32	13	16	0	12	4	5
DUF4219	0	0	0	3	9	4	0	2
DUF4243	1	0	0	4	0	0	0	0
DUF4246	0	0	0	4	0	1	0	0
DUF4291	1	0	0	2	0	0	0	0
DUF4292	0	0	0	1	0	0	0	1
DUF4293	2	0	0	1	0	0	0	0
DUF4312	0	0	0	1	0	0	0	0
DUF4339	1	1	1	1	1	1	1	0
DUF4347	1	1	0	1	3	0	3	1
DUF4371	107	367	268	6	74	77	3	22
DUF4392	1	2	2	1	3	1	1	1
DUF4397	0	0	1	1	1	1	0	1
DUF4401	0	0	0	1	0	0	1	0
DUF4404	0	0	0	2	1	0	0	2
DUF4407	0	0	0	3	2	1	4	2
DUF4414	2	2	2	2	2	2	1	3
DUF4419	0	6	6	5	0	0	3	4
DUF4428	0	0	0	1	0	0	0	0
DUF4430	2	0	0	2	2	2	1	3
DUF4440	2	1	1	1	3	1	2	1
DUF4446	0	0	0	1	0	0	0	0
DUF4448	1	0	0	3	0	1	5	3
DUF4455	1	2	1	2	1	2	0	4
DUF4456	1	1	1	2	1	1	2	1
DUF4457	1	1	1	1	1	2	2	2
DUF4460	0	0	0	1	1	1	1	0
DUF4461	0	0	0	1	2	1	1	1
DUF4470	1	1	1	1	0	2	2	8
DUF4471	1	1	1	2	1	1	1	2
DUF4472	0	4	2	1	0	1	4	2
DUF4477	2	0	1	1	0	2	1	0
DUF4483	1	1	2	1	1	1	1	0
DUF4485	1	0	1	1	0	2	1	0
DUF4486	1	1	2	1	1	1	1	1
DUF4487	2	1	1	1	1	1	2	3
DUF4490	1	1	2	1	1	1	1	0
DUF4495	1	1	1	2	1	1	1	1
DUF4496	1	0	1	1	1	1	1	1
DUF4497	1	3	2	1	2	0	1	1
DUF4498	1	1	1	1	1	2	1	0
DUF4499	0	1	0	1	1	0	1	0
DUF4502	1	1	1	1	1	1	1	0
DUF4503	0	0	0	1	1	1	1	1
DUF4504	1	0	0	1	1	1	2	0
DUF4506	2	1	1	1	0	1	1	1
DUF4508	0	0	0	1	0	0	2	2
DUF4509	1	1	1	2	1	1	0	0
DUF4513	0	0	0	1	1	1	0	1
DUF4515	2	2	2	1	2	2	5	2
DUF4523	0	0	0	1	1	2	1	1
DUF4525	1	1	1	1	1	1	1	1
DUF4528	1	1	0	1	0	1	1	0
DUF4537	8	5	7	6	6	6	11	9
DUF4539	1	0	1	1	2	1	1	2
DUF4540	0	0	0	1	1	0	1	2
DUF4541	1	0	1	2	1	2	2	0
DUF4549	0	0	0	1	1	1	2	1
DUF455	0	0	1	1	1	0	1	0
DUF4550	1	0	1	1	1	1	0	1
DUF4551	1	0	3	1	2	1	1	1
DUF4555	0	0	0	1	2	1	2	1
DUF4558	1	1	0	1	1	1	1	1
DUF4562	0	0	0	2	2	2	1	0
DUF4572	0	0	0	1	1	1	1	2
DUF4573	0	5	3	3	5	1	23	0
DUF4574	1	1	1	1	0	0	0	1
DUF4577	0	0	0	1	0	0	0	0
DUF4586	0	2	2	1	1	1	1	1
DUF4588	1	1	1	1	1	1	2	1
DUF4590	1	1	1	1	1	1	1	2
DUF4591	0	0	0	1	0	1	1	1
DUF4598	2	1	1	1	1	1	2	0
DUF4600	2	1	1	2	2	2	1	1
DUF4602	1	1	1	1	1	1	2	0
DUF4604	1	1	1	1	2	2	1	1
DUF4605	1	1	1	1	1	1	1	1
DUF4612	1	0	1	1	1	1	1	1
DUF4614	1	1	1	1	1	2	1	0
DUF4616	0	0	0	11	0	10	3	1
DUF4618	1	3	2	1	1	3	2	2
DUF4624	0	1	1	1	0	0	0	0
DUF4625	0	0	0	1	1	0	1	3
DUF4639	1	0	1	1	1	1	1	1
DUF4667	0	0	0	1	0	0	0	0
DUF4670	0	0	0	1	0	0	0	0
DUF4682	1	1	1	1	0	1	0	1
DUF4698	0	0	0	1	2	1	2	3
DUF4704	3	2	3	3	4	5	0	3
DUF4706	0	0	0	1	0	1	2	0
DUF4708	1	1	1	1	1	1	1	0
DUF4709	2	1	1	1	1	1	0	1
DUF4715	0	0	0	1	0	0	0	0
DUF4735	1	0	0	3	2	3	5	1
DUF4744	0	5	3	1	1	0	16	0
DUF4745	0	0	0	2	1	0	0	1
DUF4748	1	1	0	1	0	0	0	0
DUF4749	0	0	0	1	0	0	0	0
DUF4750	0	1	0	1	1	0	1	1
DUF4764	0	2	4	1	0	1	0	1
DUF4773	1	1	1	1	0	1	4	2
DUF4782	1	2	2	1	1	1	0	1
DUF4792	0	0	0	1	1	1	0	0
DUF4793	2	2	2	2	1	3	1	1
DUF4795	3	3	3	4	3	3	7	3
DUF4796	1	0	1	2	1	1	1	1
DUF4800	2	2	2	2	1	2	1	1
DUF4806	69	57	54	6	0	1	0	0
DUF4807	7	0	1	1	1	3	3	7
DUF4817	12	20	9	2	0	1	0	0
DUF4819	3	1	1	1	1	1	5	6
DUF4821	1	0	1	1	1	1	1	1
DUF4832	0	0	1	1	0	0	0	0
DUF4834	1	1	1	1	1	2	1	0
DUF4870	0	0	0	1	0	0	0	0
DUF4922	1	2	1	1	0	1	0	0
DUF4931	0	0	0	1	0	0	0	0
DUF4934	1	2	2	3	6	2	9	24
DUF4953	0	1	1	2	2	1	1	2
DUF4959	0	0	0	1	1	1	0	0
DUF498	1	1	1	1	1	1	2	1
DUF4988	0	0	0	2	0	0	1	1
DUF4998	0	0	0	1	0	1	1	1
DUF5001	0	0	0	1	0	0	2	0
DUF5009	3	1	2	2	0	1	2	0
DUF5010	0	0	0	1	0	0	0	0
DUF5028	0	0	0	1	0	0	0	0
DUF5034	0	0	0	1	0	0	0	0
DUF5035	0	0	0	1	0	0	0	0
DUF504	1	1	1	1	1	1	1	1
DUF5050	0	2	1	2	2	4	2	6
DUF5051	1	2	2	2	0	1	1	1
DUF5060	0	2	1	1	0	1	1	2
DUF5075	0	0	0	2	0	0	0	0
DUF5082	1	1	2	1	0	3	5	3
DUF5089	0	0	0	1	0	1	1	1
DUF5098	0	0	0	1	0	0	0	0
DUF5110	1	1	1	1	1	3	1	0
DUF5128	6	7	7	8	7	6	25	80
DUF525	1	1	1	1	1	0	2	2
DUF5305	0	0	1	1	0	0	0	3
DUF5308	0	0	0	1	0	0	0	0
DUF5310	0	0	0	1	0	0	0	0
DUF5320	0	0	0	1	0	0	0	0
DUF5353	0	0	0	1	0	0	0	0
DUF5386	0	0	0	1	0	0	0	0
DUF5407	0	0	0	1	0	0	0	0
DUF5427	0	0	0	1	0	0	1	0
DUF5449	0	0	0	1	0	0	0	0
DUF547	1	1	1	2	2	2	2	4
DUF5509	0	0	0	1	0	0	0	0
DUF563	1	1	1	2	3	4	4	3
DUF572	2	2	2	2	2	2	3	3
DUF573	1	1	1	2	0	3	0	1
DUF608	5	4	3	3	4	2	5	9
DUF639	0	0	0	1	1	0	0	2
DUF641	0	1	0	1	0	0	1	1
DUF647	1	2	2	2	1	3	1	7
DUF667	3	3	3	3	3	2	2	3
DUF676	2	2	3	5	3	2	3	1
DUF719	1	1	1	1	1	1	1	0
DUF724	0	2	1	2	1	0	1	1
DUF727	0	1	1	1	2	3	2	0
DUF745	0	1	1	3	2	1	6	1
DUF747	1	1	1	1	1	1	1	1
DUF758	1	1	1	1	0	2	1	1
DUF766	1	1	0	1	0	1	1	1
DUF773	1	1	1	2	1	1	1	2
DUF775	1	1	1	1	1	1	1	0
DUF812	4	5	3	6	6	4	4	3
DUF814	2	2	2	2	2	2	2	3
DUF815	11	7	10	10	14	11	15	8
DUF818	0	0	0	2	0	0	0	0
DUF829	0	0	0	2	3	3	2	2
DUF836	2	1	2	1	1	2	2	2
DUF842	1	0	0	1	1	1	2	0
DUF846	1	2	2	1	1	1	1	1
DUF848	0	0	0	1	0	0	0	0
DUF866	1	1	1	1	1	1	1	0
DUF883	0	0	0	1	0	0	2	1
DUF885	9	9	6	7	7	7	20	22
DUF89	2	5	4	2	2	3	2	2
DUF900	0	0	0	2	0	0	2	0
DUF902	1	1	1	1	1	1	1	1
DUF903	0	0	0	1	0	1	0	0
DUF908	1	1	1	1	0	1	0	0
DUF913	1	2	3	1	1	1	0	2
DUF917	2	1	2	5	1	0	0	3
DUF92	1	1	1	1	2	1	1	1
DUF924	1	3	2	1	1	1	2	3
DUF937	0	0	0	1	0	0	0	1
DUF938	0	1	1	1	0	2	4	0
DUF953	1	1	1	2	1	1	1	2
DUF971	3	1	1	3	3	3	10	4
DUF974	1	1	1	1	2	1	1	1
DUF998	1	2	3	2	0	1	0	0
Dus	8	7	6	8	7	7	7	2
DUSP	3	3	3	3	4	4	3	5
dUTPase	4	46	5	2	1	2	3	2
DWNN	1	0	1	1	1	1	1	0
DXP_synthase_N	4	5	3	3	6	3	5	0
Dymeclin	2	3	3	3	4	2	4	3
Dynactin	1	1	1	1	1	0	2	2
Dynactin_p22	2	1	1	1	2	1	1	1
Dynactin_p62	2	1	1	1	2	1	1	0
Dynamin_M	2	3	2	2	3	3	2	9
Dynamin_N	33	25	21	19	16	9	22	40
Dynamitin	1	3	1	2	1	1	3	1
Dynein_attach_N	1	1	1	2	1	1	1	1
Dynein_heavy	12	16	14	20	21	20	25	33
Dynein_light	2	2	1	1	3	1	2	3
Dyp_perox	1	1	1	1	0	0	1	0
DZF	2	3	2	2	2	2	2	3
Dzip-like_N	1	2	2	1	1	1	1	1
DZR	2	2	1	6	3	16	6	4
E1_4HB	2	2	3	1	2	3	3	1
E1_DerP2_DerF2	9	10	10	9	8	5	7	8
E1_dh	8	9	5	5	9	6	9	5
E1_FCCH	2	1	2	2	1	2	2	2
E1_UFD	2	1	1	1	1	0	2	2
E1-E2_ATPase	27	29	33	19	18	11	17	13
E2F_CC-MB	2	2	2	3	2	2	6	2
E2F_TDP	4	4	4	5	4	4	9	4
E3_binding	4	1	2	3	4	3	3	0
E3_UbLigase_R4	1	1	1	1	2	1	1	2
E3_UFM1_ligase	1	1	1	1	1	1	1	2
EABR	0	0	0	1	0	0	0	0
Ead_Ea22	0	0	0	1	0	0	0	0
EAF	2	1	1	1	1	1	0	0
Eaf7	1	1	1	1	1	1	1	1
EamA	23	24	25	34	23	19	29	11
EAP30	2	2	1	1	2	3	3	3
EB1	1	1	1	1	1	1	1	1
Ebp2	3	1	1	1	1	1	1	1
ECH_1	15	10	10	14	17	15	18	12
ECH_2	13	8	8	13	17	14	17	8
EcKinase	4	4	4	3	3	1	5	1
Ecm29	1	0	1	1	2	1	1	3
ECR1_N	2	1	2	2	2	2	2	3
ECSIT_C	1	2	2	2	1	1	1	0
EDR1	1	1	1	1	1	1	1	1
EF_assoc_1	1	1	2	1	1	1	1	1
EF_assoc_2	1	1	1	1	1	2	2	1
EF_TS	2	1	1	1	2	1	1	1
EF-1_beta_acid	2	4	2	1	2	0	2	1
EF-hand_1	120	121	124	149	151	150	175	132
EF-hand_10	5	6	6	7	12	6	5	1
EF-hand_11	5	5	8	8	14	13	11	10
EF-hand_2	2	1	2	2	3	2	4	3
EF-hand_3	2	2	3	2	3	1	4	1
EF-hand_4	29	27	27	38	37	35	33	23
EF-hand_5	91	86	85	111	117	104	133	92
EF-hand_6	120	114	117	149	147	151	176	123
EF-hand_7	114	110	116	146	146	150	175	127
EF-hand_8	92	85	84	120	116	115	143	104
EF-hand_9	31	25	27	36	39	36	33	25
EF-hand_like	3	2	4	4	5	6	8	1
EF1_GNE	2	4	2	2	2	2	2	2
EF1G	1	1	1	1	1	1	1	1
EFG_C	7	6	5	5	6	6	5	6
EFG_II	9	5	5	5	6	4	4	3
EFG_IV	6	4	4	4	5	3	3	2
EFhand_Ca_insen	5	6	5	6	7	7	12	7
efThoc1	1	2	3	1	1	1	1	3
EFTUD2	1	1	1	1	1	1	1	1
EGF	93	97	94	126	92	189	333	299
EGF_2	25	42	27	46	37	57	150	72
EGF_3	69	85	84	65	55	109	169	187
EGF_CA	101	121	119	92	87	157	214	239
EGF_MSP1_1	29	39	41	17	14	47	58	90
EHD_N	1	1	1	1	1	1	1	0
EI24	1	1	1	3	2	0	1	1
EIF_2_alpha	1	1	1	1	1	1	2	1
eIF_4EBP	1	1	1	2	1	0	1	3
eIF-1a	2	2	3	2	2	2	4	1
eIF-3_zeta	1	2	1	1	1	2	1	1
eIF-3c_N	1	2	1	1	1	1	2	2
eIF-5_eIF-2B	2	2	2	1	2	2	3	1
eIF-5a	1	3	1	1	1	1	1	1
eIF-6	1	2	1	1	1	2	1	1
eIF2A	30	30	27	32	30	31	37	20
eIF3_N	1	1	1	1	1	2	3	2
eIF3_p135	1	2	1	1	0	1	1	1
eIF3_subunit	1	1	1	1	1	1	1	1
eIF3g	1	1	1	3	6	1	2	2
EIF4E-T	1	1	1	1	1	1	2	2
EII-Sor	0	0	0	1	0	0	0	0
Elf1	2	2	2	2	1	2	4	0
ELFV_dehydrog	2	1	1	2	6	3	4	4
ELFV_dehydrog_N	2	1	1	2	4	3	4	4
ELL	1	1	1	1	1	1	1	1
ELM2	5	6	5	5	4	3	3	4
ELMO_CED12	3	4	3	3	2	2	3	3
ELO	5	6	5	4	4	4	4	4
EloA-BP1	1	1	1	1	1	1	1	2
Elong_Iki1	1	1	1	3	2	1	1	1
Elongin_A	1	0	1	2	3	3	1	0
ELP6	1	1	1	1	1	1	1	2
EMG1	1	1	1	1	1	1	1	1
EMI	2	0	0	2	5	3	1	2
EMP24_GP25L	10	9	9	8	5	8	8	5
EMP70	4	6	5	6	4	9	4	7
EmrE	1	1	1	1	1	1	1	0
End3	0	0	0	1	0	0	0	0
EndIII_4Fe-2S	0	1	1	1	0	0	0	0
Endomucin	0	0	0	1	1	0	1	0
Endonuclease_7	46	5	9	3	5	1	1	0
Endonuclease_NS	3	2	2	8	2	7	4	17
Endostatin	0	0	0	1	1	1	0	0
Endosulfine	1	1	1	1	1	1	1	1
EndoU_bacteria	0	0	0	1	0	0	1	0
Enkurin	2	2	3	2	3	3	2	2
Enolase_C	3	3	2	2	3	3	4	2
Enolase_N	2	2	1	1	2	1	1	1
ENT	1	1	2	1	0	1	2	0
ENTH	4	2	4	4	4	5	4	1
EOS1	0	0	0	1	0	1	0	0
EphA2_TM	7	7	10	8	2	3	5	11
Ephrin	5	3	4	5	4	3	4	8
Ephrin_lbd	1	0	0	1	2	5	3	14
Ephrin_rec_like	29	38	33	54	23	20	30	39
Epimerase	28	26	24	26	26	25	45	27
EPL1	3	1	2	3	2	3	2	4
EPTP	4	6	5	4	5	5	4	2
ER	1	1	1	1	1	1	2	1
ERAP1_C	10	16	13	14	6	7	8	9
ERCC3_RAD25_C	8	10	10	6	3	6	10	4
ERCC4	2	3	3	3	3	2	3	3
eRF1_1	2	2	3	2	2	4	2	3
eRF1_2	2	2	2	2	2	3	2	2
eRF1_3	2	2	2	2	2	3	2	0
Erf4	2	2	2	1	2	2	2	1
ERG4_ERG24	2	0	1	3	3	2	2	2
ERGIC_N	3	2	2	3	3	3	4	1
ERK-JNK_inhib	1	1	1	1	1	1	0	1
ERM	6	12	5	8	7	7	4	7
ERO1	1	1	1	1	1	1	1	2
ERp29	2	2	2	3	3	3	2	3
ERp29_N	0	0	0	1	1	2	2	4
Erv26	1	1	1	1	1	1	1	0
Erythro_esteras	0	0	0	1	0	0	0	0
Es2	2	1	1	3	1	1	2	3
ESCRT-II	1	1	1	1	1	2	1	0
EST1	3	2	3	3	3	2	2	2
EST1_DNA_bind	4	4	5	5	5	5	3	5
Esterase	5	5	8	1	4	5	4	5
ETC_C1_NDUFA5	0	1	1	1	1	1	1	1
ETF	3	3	2	2	2	2	3	2
ETF_alpha	1	1	1	1	1	1	1	0
ETF_QO	2	1	1	1	1	1	2	2
Ets	9	11	11	13	14	21	16	12
ETS_PEA3_N	1	0	3	1	1	1	1	1
ETX_MTX2	4	0	1	5	0	3	3	1
EURL	1	1	1	1	0	0	0	0
EVC2_like	0	0	0	1	1	0	1	3
EVE	1	1	1	1	1	1	1	1
EVI2A	1	0	1	1	1	2	0	0
Evr1_Alr	2	1	2	2	2	2	2	1
Exo_endo_phos	25	37	318	56	467	228	40	38
Exo_endo_phos_2	19	129	582	101	657	368	61	26
Exo70	1	0	1	3	1	1	1	1
Exo84_C	1	2	1	1	1	1	1	1
EXOSC1	1	0	1	1	1	1	1	0
Exostosin	3	3	3	3	4	4	4	5
EXS	1	3	2	1	1	1	0	3
EzrA	1	4	3	7	7	2	6	4
F_actin_cap_B	1	2	1	1	1	1	2	1
F-actin_cap_A	1	1	2	1	1	1	1	1
F-box	23	22	24	44	42	50	69	36
F-box_4	1	0	1	6	3	5	6	3
F-box-like	24	26	30	61	47	56	72	40
F420_oxidored	10	8	8	12	10	21	9	6
F5_F8_type_C	69	56	67	59	87	144	347	195
FA	4	3	3	5	5	6	6	3
FA_desaturase	3	2	2	1	4	3	8	10
FA_hydroxylase	3	2	1	5	3	4	6	1
FAA_hydrolase	3	3	3	4	3	3	5	4
FAA_hydrolase_N	1	1	1	1	1	1	2	1
FACT-Spt16_Nlob	1	1	1	1	0	3	1	1
FAD_binding_1	7	5	5	7	4	7	5	6
FAD_binding_2	24	11	12	21	21	20	29	21
FAD_binding_3	11	8	9	12	11	13	20	13
FAD_binding_4	6	2	1	11	7	7	7	10
FAD_binding_6	5	3	3	3	3	4	5	4
FAD_binding_7	4	1	1	3	0	2	7	5
FAD_binding_8	5	2	3	4	6	4	4	2
FAD_oxidored	15	6	7	11	12	10	15	11
FAD-oxidase_C	4	2	2	2	4	4	4	4
FadA	0	1	0	1	0	0	0	0
FAIM1	1	1	1	1	1	1	1	1
FAM110_C	0	0	0	1	0	0	0	0
FAM117	1	1	1	1	1	1	1	1
FAM176	0	5	0	5	0	3	3	1
FAM177	1	0	0	1	1	1	1	1
FAM178	1	0	1	1	1	2	2	1
FAM181	2	2	2	2	2	3	3	3
FAM183	1	1	1	3	3	3	1	1
FAM184	1	0	0	3	1	1	0	3
FAM194	1	0	2	2	2	2	1	2
FAM199X	1	1	1	1	1	1	1	1
FAM216B	0	0	0	1	1	1	1	1
FAM219A	1	1	1	1	1	1	1	0
FAM220	1	1	1	1	1	1	1	1
FAM221	1	1	1	1	2	2	2	1
FAM47	0	0	1	1	0	1	6	0
FAM60A	1	1	1	1	1	3	2	1
FAM76	1	1	1	2	1	1	2	2
FAM91_C	1	1	1	1	1	2	1	2
FAM91_N	1	1	1	1	2	1	1	1
FAM92	3	3	3	1	3	1	2	2
FancD2	1	2	2	1	2	2	0	4
FANCF	1	1	1	1	1	1	1	2
FANCI_HD1	2	1	1	1	0	1	1	0
FANCI_HD2	1	2	1	1	0	0	1	1
FANCI_S1	1	0	1	1	0	1	2	0
FANCI_S2	1	0	1	1	0	2	2	2
FANCI_S3	1	0	1	2	1	1	0	1
FANCI_S4	1	1	1	1	1	1	1	0
FANCL_C	2	3	3	5	3	3	3	0
FANCM-MHF_bd	1	0	0	2	1	0	0	1
FAO_M	0	2	2	2	3	2	4	1
FAP206	2	6	2	2	3	4	1	2
Fapy_DNA_glyco	1	1	1	1	1	0	1	0
Far-17a_AIG1	2	1	1	4	5	4	3	4
FAR1	3	14	20	6	2	0	1	0
Fasciclin	4	6	6	6	9	5	6	6
Fascin	7	14	15	9	3	2	5	2
FAT	5	9	7	8	6	5	5	8
FATC	6	4	6	4	6	4	5	6
FbpA	1	1	1	1	0	2	0	0
FBPase	1	1	1	1	1	1	2	1
Fcf1	2	2	1	2	1	2	3	2
FCH	9	5	9	7	9	7	10	5
FctA	0	0	0	1	0	0	1	0
FDF	2	2	2	2	2	2	1	1
FDX-ACB	3	1	2	2	2	1	1	4
Fe_hyd_lg_C	1	1	1	1	1	1	1	1
Fe-ADH	1	2	1	1	1	1	3	2
Fe-ADH_2	1	1	2	2	1	1	4	1
Fe-S_biosyn	2	2	2	1	2	2	3	0
FeoB_N	29	19	20	23	29	19	30	29
FeoC	2	0	2	1	0	1	0	1
Fer2	6	3	4	3	5	6	4	4
Fer2_3	2	1	1	1	1	0	2	1
Fer2_4	2	1	1	1	1	1	1	2
Fer4	1	3	3	4	2	4	2	5
Fer4_10	4	4	4	7	3	4	6	4
Fer4_12	3	1	1	1	0	2	2	0
Fer4_14	3	0	0	1	1	2	2	0
Fer4_16	1	1	2	3	1	2	2	2
Fer4_17	4	3	3	4	3	3	4	3
Fer4_2	1	3	4	4	2	3	3	3
Fer4_20	2	2	2	1	1	1	2	2
Fer4_21	3	2	3	4	2	4	2	3
Fer4_4	1	1	1	1	2	2	1	1
Fer4_6	2	3	4	3	2	4	5	4
Fer4_7	3	3	4	5	2	4	5	5
Fer4_8	4	2	2	2	2	1	5	3
Fer4_9	2	2	2	4	2	4	2	3
Fer4_NifH	5	3	4	2	1	3	4	0
FerA	1	1	2	1	1	1	3	3
FerB	6	6	7	5	6	4	5	4
FerI	5	3	4	4	4	4	6	1
Ferlin_C	8	9	7	6	5	4	4	3
FERM_C	14	13	12	16	13	13	14	7
FERM_f0	3	2	2	3	1	2	2	1
FERM_M	25	25	23	28	24	27	26	24
FERM_N	14	16	16	21	18	17	21	15
Ferric_reduct	6	3	4	6	7	9	3	4
Ferritin	10	13	9	3	5	4	9	5
Ferrochelatase	2	1	1	1	1	2	2	3
FeS_assembly_P	3	1	1	2	2	1	2	1
Fes1	1	1	1	1	1	1	2	1
FEZ	1	1	2	3	2	1	2	1
Fez1	0	1	1	7	6	2	6	5
FF	3	3	3	3	3	4	3	5
FG-GAP	12	10	10	12	10	10	11	12
FG-GAP_2	2	1	0	7	1	2	1	2
FGase	1	0	0	2	0	0	0	0
FGE-sulfatase	2	3	3	1	2	2	4	3
FGF	16	12	16	10	13	18	13	13
FGGY_C	7	4	4	2	5	6	5	3
FGGY_N	4	4	4	3	5	5	9	4
FH2	6	7	8	8	11	8	11	12
FHA	24	18	17	20	22	21	23	21
Fib_alpha	1	2	1	6	1	3	3	1
FIBP	1	1	1	1	1	2	1	0
Fibrillarin	1	2	1	2	2	0	1	1
Fibrinogen_C	15	22	26	141	8	110	118	111
Fic	1	2	2	2	1	1	1	4
Fil_haemagg_2	3	0	0	1	0	1	0	2
Filament	5	6	9	10	7	14	5	13
Filamin	12	14	14	18	21	26	43	94
FimP	1	1	1	3	1	2	2	1
Fip1	1	1	1	1	0	0	1	0
Fis1_TPR_C	7	11	9	9	7	12	10	11
Fis1_TPR_N	1	1	1	1	1	1	1	1
FKBP_C	14	12	13	10	14	11	12	7
FlaC_arch	0	2	1	2	0	0	3	3
Flavodoxin_1	8	7	7	7	5	4	6	5
Flavoprotein	2	1	2	1	1	1	1	0
FlgD_ig	1	0	0	1	0	0	1	1
FliJ	0	0	0	1	0	0	0	2
Flot	2	2	2	2	4	2	2	2
FMN_dh	4	4	4	4	4	4	12	0
FMN_red	2	3	4	5	1	3	1	1
FMO-like	8	3	4	16	8	13	6	14
Fmp27_GFWDK	1	1	1	1	1	1	1	1
fn2	19	9	13	8	7	12	13	15
fn3	84	115	100	99	83	104	99	208
fn3_2	6	4	4	6	6	7	12	17
fn3_3	0	0	0	1	0	0	3	1
fn3_4	3	3	3	2	2	1	1	8
Fn3_assoc	2	2	2	1	1	1	1	0
FNIP_C	1	1	1	1	1	1	1	2
FNIP_M	1	1	1	1	1	1	1	3
FNIP_N	1	1	1	1	1	1	1	1
Focadhesin	1	1	1	1	1	1	1	1
Focal_AT	1	2	3	1	1	1	0	0
Foie-gras_1	3	2	2	1	1	1	2	2
Folate_carrier	1	1	2	1	2	1	1	1
Folate_rec	2	2	2	1	7	6	8	5
Folliculin	2	2	1	1	3	2	0	1
Folliculin_C	1	1	1	1	1	1	0	4
FOP_dimer	2	2	2	1	2	2	3	0
FoP_duplication	1	4	2	2	2	0	1	1
Forkhead	17	17	16	19	18	26	34	22
Formyl_trans_C	4	1	1	2	4	2	3	3
Formyl_trans_N	5	3	3	2	4	3	5	2
FOXP-CC	2	5	3	4	4	8	8	1
FPL	1	2	1	1	1	1	2	0
FPN1	2	4	4	2	1	1	1	0
FPP	4	0	1	1	4	1	5	7
FR47	9	8	7	7	10	11	14	2
Fra10Ac1	1	1	1	1	1	1	1	1
Frag1	9	10	9	9	5	10	10	6
FragX_IP	2	4	3	2	1	1	1	1
Frataxin_Cyay	1	1	1	1	2	1	1	1
FRB_dom	1	1	1	3	2	1	1	4
FRG1	3	10	9	4	2	3	2	1
Fringe	12	14	12	9	8	5	12	10
Frizzled	8	6	5	5	10	7	8	7
Frtz	4	2	2	1	3	6	6	1
FSA_C	1	2	1	1	1	2	0	1
FSH1	5	2	3	1	4	2	2	3
FSIP1	1	1	1	1	1	1	1	2
FTA2	3	0	0	6	4	5	4	4
FTCD_C	0	0	0	1	1	1	1	3
FTHFS	1	3	1	1	2	1	1	3
FtsA	5	3	3	1	3	1	3	1
FtsH_ext	3	2	2	1	1	1	2	1
FtsJ	4	5	6	5	7	9	9	11
FtsK_SpoIIIE	2	2	2	4	2	2	4	5
Fucokinase	2	4	4	3	2	1	1	4
Fucosidase_C	3	6	6	1	2	2	7	4
FumaraseC_C	2	2	1	1	2	1	1	1
Fumble	1	1	1	2	1	1	1	2
FUN14	1	2	1	1	1	1	1	1
Furin-like	1	2	2	1	2	3	1	1
Furin-like_2	2	2	2	3	4	3	5	5
FWWh	3	1	1	2	1	2	2	2
FXa_inhibition	71	85	92	60	57	98	179	136
FXMRP1_C_core	0	1	1	1	1	1	1	0
FYRC	5	3	3	3	2	2	5	2
FYRN	4	3	3	2	2	3	3	1
FYTT	0	0	0	1	0	0	1	2
FYVE	23	18	20	23	24	23	25	20
FYVE_2	5	4	6	6	4	3	7	3
Fz	10	10	10	14	23	18	18	26
Fzo_mitofusin	1	1	1	1	3	1	1	3
G_glu_transpept	16	18	16	13	14	12	17	12
G-alpha	29	28	27	29	32	29	37	22
G-gamma	2	2	3	1	5	7	4	3
G-patch	18	17	19	14	15	13	22	9
G-patch_2	7	6	9	8	8	8	14	4
G10	1	1	1	1	1	0	1	1
G6PD_C	1	2	2	1	3	2	4	3
G6PD_N	1	1	1	1	3	2	3	1
G8	1	3	3	5	4	1	2	8
Gaa1	1	2	1	2	1	1	2	1
GAF	6	4	6	6	6	4	12	7
GAF_2	7	3	5	5	6	3	9	5
GAF_3	4	0	4	4	5	3	6	4
gag_pre-integrs	5	0	4	10	49	7	0	7
gag-asp_proteas	55	22	61	33	275	79	8	96
GAGA	3	2	2	11	5	30	14	4
GAIN	2	5	8	6	7	7	6	15
Gal_Lectin	24	41	48	34	24	42	50	25
Gal_mutarotas_2	6	5	5	2	4	4	2	2
Gal-3-0_sulfotr	16	19	20	11	6	4	10	5
Galactosyl_T	36	32	33	39	22	26	40	21
GalKase_gal_bdg	1	1	1	1	3	2	2	2
GalP_UDP_tr_C	1	0	1	1	1	1	1	1
GalP_UDP_transf	1	1	1	1	1	1	1	0
Gar1	2	2	2	2	2	2	2	3
GARS_A	3	1	2	2	0	1	3	1
GAS	5	15	9	14	6	9	5	10
GAS2	5	5	4	3	4	4	4	4
Gasdermin	1	1	1	1	1	1	1	0
GAT	3	2	2	3	3	3	3	1
GATA	4	4	5	3	7	7	4	5
GATase	16	13	15	18	15	15	13	7
GATase_3	1	1	0	2	5	2	4	0
GATase_4	1	2	2	1	2	2	2	2
GATase_6	6	3	3	3	3	3	6	3
GATase_7	6	4	4	3	4	4	6	3
Gate	1	1	0	1	4	2	2	5
GBP	7	2	3	1	1	5	6	18
GBP_C	4	0	1	1	1	1	3	9
Gcd10p	3	1	1	1	1	1	1	3
GCD14	3	4	2	3	5	3	4	5
GCFC	2	2	2	2	2	2	2	1
GCIP	1	0	0	1	2	1	1	3
Gcn1_N	1	1	0	1	0	0	0	0
GCN5L1	0	1	1	3	1	2	2	1
GCS	2	2	2	3	2	3	2	1
GCV_H	3	1	1	2	2	2	3	1
GCV_T	6	4	5	6	6	5	7	2
GCV_T_C	5	4	4	3	5	5	6	1
GD_N	0	0	0	1	1	3	0	0
GDA1_CD39	3	9	4	7	4	4	4	3
GDC-P	2	1	1	1	1	1	2	1
GDE_C	3	3	3	4	3	1	0	3
GDI	2	3	3	3	2	2	3	6
GDNF	2	1	0	1	1	1	1	0
GDP_Man_Dehyd	18	16	15	12	15	9	23	14
GDPD	7	5	5	5	5	11	6	5
GDWWSH	0	0	0	1	1	1	2	0
Ge1_WD40	23	27	22	26	27	29	31	17
GED	2	1	2	2	2	2	2	6
Gelsolin	12	12	10	13	11	10	19	11
Gemin6	1	1	1	1	1	2	1	3
Gemini_AL1	0	0	0	3	0	3	0	0
Geminin	1	1	1	1	1	1	0	1
GET2	0	0	0	1	0	0	0	0
[truncated: 3,147 more rows]
